1 **CwlQ is required for swarming motility but not flagellar assembly in *Bacillus subtilis***

2

3 Sandra Sanchez, Caroline M Dunn, and Daniel B. Kearns

4 Department of Biology, Indiana University, Bloomington IN 47405

5

6

7

8 **ABSTRACT**

9           **Hydrolytic enzymes play an essential role in the remodeling of bacterial**  
10 **peptidoglycan (PG), an extracellular mesh-like structure that retains the membrane in the**  
11 **context of high internal osmotic pressure. Peptidoglycan (PG) integrity must be**  
12 **unfailingly stable to preserve cell integrity but must also be dynamically remodeled for**  
13 **the cell grow, divide and insert macromolecular machines. The flagellum is one such**  
14 **macromolecular machine that transits the PG and the insertion of which is aided by**  
15 **localized activity of a dedicated PG hydrolase in Gram-negative bacteria. To date, there**  
16 **is no known dedicated hydrolase in Gram-positive bacteria for insertion of flagella and**  
17 **here we take a reverse-genetic candidate-gene approach to find that cells mutated for the**  
18 **lytic transglycosylase CwlQ exhibited a severe defect in flagellar dependent swarming**  
19 **motility. We show that CwlQ required its active site to promote swarming, was**  
20 **expressed by the motility sigma factor SigD, and was secreted by the type III secretion**  
21 **system housed inside the flagellum. Nonetheless, cells mutated for CwlQ remained**  
22 **proficient for flagellar biosynthesis even when mutated in combination with four other**  
23 **hydrolases related to motility (LytC, LytD, LytF, and CwIO). The PG hydrolase essential**  
24 **for flagellar synthesis in *B. subtilis*, if any, remains unknown.**

25

26

## 27 INTRODUCTION

28 Most bacteria are surrounded by an extracellular cell wall that prevents catastrophic  
29 hyper-expansion of the membrane by the high internal osmotic pressure of the cytoplasm. The  
30 wall is a semi-elastic macromolecular mesh of peptidoglycan (PG) comprised of long polymers  
31 of an *N*-acetyl-glucosamine-*N*-acetyl-muramic acid disaccharide that are cross-linked by amino  
32 acid side chains (1,2). While the chemistry of peptidoglycan is relatively invariant, bacteria  
33 differ in the organization of PG with respect to overall envelope architecture. In cells with a  
34 Gram-negative envelope, the PG is only 1 to 3 layers thick and lays between the plasma and  
35 outer cell membrane, whereas cells with a Gram-positive envelope have a much thicker PG wall  
36 and lack an outer membrane (3-6). Regardless of the type of envelope, the semi-elastic PG  
37 network must be both stable and continuous to maintain cell integrity but dynamically remodeled  
38 to allow for cell growth, cell division and the insertion of transenvelope nanomachines.

39 One nanomachine that is inserted through the peptidoglycan is the propeller-like  
40 flagellum that bacteria rotate to swim in liquid or swarm over solid surfaces. Flagella are  
41 constructed from over 30 different proteins that are tightly regulated to ensure stoichiometry and  
42 sequential assembly (7,8). The first architectural unit of the flagellum to be assembled is the  
43 basal body that is inserted in the plasma membrane and houses a dedicated type III secretion  
44 system (9,10). Once activated, the type III secretion system secretes the distal components of  
45 the flagellum including the structural units of the axle-like rod that is polymerized until it reaches  
46 the outer membrane in Gram-negative bacteria, followed by the flexible universal-joint hook (11-  
47 16). Hook synthesis terminates when it reaches a particular length, at which point the secretion  
48 system transitions to exporting subunits that form the long helical polymer of the filament  
49 (17,18). Thus, flagella are constructed from the inside-out and must not only cross all layers of  
50 the envelope but freely rotate within them.

51 The PG is thought to present a structural barrier to flagellar construction at the level of  
52 rod (19-21). The rod is the part of the flagellum that spans the PG, and the rod's diameter of 8-

53 13 nm (22-26) seems incompatibly wide relative to the estimated PG pore size of 2-7 nm (6,  
54 27,28). The first evidence that PG remodeling was required for flagellar assembly came from  
55 the observation that mutants in the Gram positive bacterium *B. subtilis* defective in the  
56 expression of multiple autolysins (PG hydrolases) were also defective in motility and flagellar  
57 biosynthesis (29,30). Later, the role of PG remodeling was further supported in the Gram  
58 negative bacteria *Salmonella enterica*, *Rhodobacter sphaeroides*, and *Caulobacter crescentus*  
59 when mutants defective in particular PG hydrolases were defective in motility and flagellar  
60 assembly (31-35). Remarkably, despite the foundational report, the specific PG hydrolase  
61 required for flagellar assembly is not known in *Bacillus subtilis*, and the rod in this organism  
62 must penetrate PG that is approximately 50 nm thicker than that of Gram-negative bacteria.  
63 Moreover, how the rod transits the peptidoglycan is not known for any Gram-positive bacterium.

64 *B. subtilis* encodes over 30 annotated PG hydrolases in its genome and here we take a  
65 reverse-genetic approach to screen known and putative hydrolases to find genes required for  
66 flagellar insertion (36,37). Of the candidates tested, mutation of two PG hydrolases, the  
67 vegetative endopeptidase CwIO (38,39) and the poorly understood lytic-transglycosylase CwIQ  
68 (40), exhibited a moderate and severe defect in swarming motility, respectively. Seemingly  
69 consistent with being a hydrolase involved in flagellar assembly, CwIQ required its active site  
70 residue for swarming motility, was expressed by the motility sigma factor SigD and was  
71 secreted by the type III secretion system within the flagellum. Inconsistent with being required  
72 for flagellar assembly, motility was restored to the *cwIQ* mutant when motility agar concentration  
73 was decreased below that of standard swarming conditions and cells mutated for *cwIQ* could  
74 both swim and synthesize flagella. Our work suggests that although CwIQ is not required for  
75 insertion of the flagella through the PG, it is conditionally required for motility and may play a  
76 role in flagella function specifically on harder surface environments. Finally a quintuple mutant  
77 disrupting all known SigD-dependent hydrolases and *cwIO* was proficient for flagellar assembly.  
78 The PG hydrolase required for flagellar assembly in *B. subtilis*, if any, remains unknown.

## 79 RESULTS

80 **CwlQ is conditionally required for swarming motility.** *B. subtilis* is predicted to encode many  
81 peptidoglycan hydrolases, some of which have been biologically and/or biochemically  
82 demonstrated to cleave peptidoglycan, and some of which have a predicted function based on  
83 sequence homology (36,37) (**Table 1**). A reverse-genetic approach was taken to determine  
84 which, if any, of the peptidoglycan hydrolase candidates were required for flagellar assembly in  
85 *B. subtilis*. To narrow the pool of candidates, hydrolases and putative hydrolases were  
86 excluded if they had been previously tested for flagellar biogenesis (41), if they were expressed  
87 only during sporulation or encoded within horizontally-transferred genetic elements (e.g.  
88 prophages). The remaining candidate genes were mutated, and the resulting mutants were  
89 tested for the flagellar-dependent swarming motility (**Table 1**). Most of the mutants were wild  
90 type for swarming behavior and were discarded from further study (**Fig S1**). Cells mutated for  
91 either *cw/Q* (**Fig 1A**) or *cw/O* (**Fig 1B**) however, exhibited more severe swarming defects.  
92 Moreover, the phenotypes of neither the *cw/Q* nor *cw/O* mutants were due to polar effects on  
93 neighboring genes as swarming motility was complemented to wild type when the gene was  
94 cloned with 500 bp of upstream DNA (in the case of *cw/Q*) (**Fig 1A**) or expressed from an IPTG-  
95 inducible construct (in the case of *cw/O*) (42) (**Fig 1B**) and inserted at an ectopic locus in the  
96 respective mutant. We conclude that CwlO and CwlQ are required for swarming motility under  
97 standard conditions. CwlO encodes the vegetative endopeptidase required for cell elongation  
98 (38,39,42), and we focused our study on the lytic transglycosylase CwlQ as it conferred a more  
99 severe swarming defect and its function was poorly-understood (40).

100 Swarming motility requires flagella and one way in which CwlQ could promote swarming  
101 is by remodeling the peptidoglycan to facilitate flagellar assembly (43). To determine whether  
102 the *cw/Q* mutant exhibited a flagellar assembly defect, the *cw/Q* gene was mutated in a strain  
103 that encoded a variant of the flagellin protein that could be fluorescently labeled with a  
104 maleimide dye (Hag<sup>T209C</sup>) (44). After staining, the *cw/Q* mutant was found to be proficient for

105 flagellar filament assembly but appeared to have a qualitative reduction in filament number  
106 relative to wild type (**Fig 2A**). Precise counting of filaments in *B. subtilis* is difficult, but filament  
107 number can be indirectly assessed by counting the number of flagellar hooks and basal bodies  
108 as proxies. Thus, to explore whether the *cw/Q* mutant exhibited a defect in flagellar number, the  
109 *cw/Q* gene was mutated in a strain that either encoded a variant of the hook protein that could  
110 be fluorescently labeled with a maleimide stain (FlgE<sup>T123C</sup>) or a GFP-fusion to the flagellar basal  
111 body protein FliM (12,45). In these backgrounds, the flagellar hooks (**Fig 2B**) and basal bodies  
112 (**Fig 2C**) appeared as fluorescent dots, and 3D-structured illumination microscopy was used to  
113 count the number of each in both wild type and the *cw/Q* mutant. Quantitative analysis  
114 indicated that there was a subtle but statistically significant reduction (students T-test p  
115 value < 0.00003) in the number of flagellar hooks and basal bodies in the *cw/Q* mutant (**Fig 2D**,  
116 **Table S1**). A two-fold increase in flagellar density on surfaces has been shown to be critical for  
117 swarming motility in *B. subtilis* (46) and the inability of the *cw/Q* mutant to swarm might be  
118 related to the slight reduction in flagellar hook number observed in liquid.

119 Another way that the absence of CwlQ might give rise to a swarming defect is if the  
120 mutant flagella are defective for rotation. To determine whether the flagella of a *cw/Q* mutant  
121 were functional for flagellar rotation, cells were centrally inoculated on LB media fortified with  
122 0.3% agar in which the pores in the agar were sufficiently large to permit swimming motility. As  
123 *B. subtilis* preferentially migrates over surfaces, cells were discouraged from surface migration  
124 by using a background that was mutated for both surfactant and extracellular polysaccharide  
125 biosynthesis (43,47-51). Wild type created a large zone of colonization after 12 hours of  
126 incubation whereas a mutant defective in the flagellar filament protein Hag grew as a tight  
127 central colony (**Fig 3**). Cells mutated for *cw/Q* produced a zone of colonization similar to that of  
128 the wild type (**Fig 3**). Moreover, cells of the *cw/Q* mutant were vigorously motile when grown to  
129 exponential phase in liquid media and observed by wet mount microscopy. We conclude that  
130 cells mutated for *cw/Q* are not only proficient in flagellar assembly but are also proficient for

131 swimming.

132 As the *cw/Q* mutant exhibited wild type swimming motility in liquid, wild type colonization  
133 of 0.3% agar, and only a slight reduction in flagellar hook number, we wondered whether the  
134 swarming defect was dependent on the hardness of the agar surface. For the wild type, swarm  
135 radius was inversely proportional to agar concentration after 4 hours of incubation and  
136 swarming was fully inhibited on media solidified with 0.9% agar (**Fig 1C**). Swarming of the *cw/Q*  
137 mutant was fully inhibited after 4 hours at the standard conditions of 0.7% agar, but swarm  
138 radius increased with decreasing agar concentration such that the mutant swarmed like the wild  
139 type on media solidified with 0.5% agar (**Fig 1C**). Swarming rescue at substandard agar  
140 concentrations appeared to be specific to the *cw/Q* mutant as at least two other mutants  
141 defective in swarming motility, *swrA* (defective due to reduced flagellar number) (45,52,53) and  
142 *swrD* (defective due to reduced flagellar torque) (54), remained non-swarming at all agar  
143 concentrations tested (**Fig 1D**). We conclude that the requirement for CwlQ differs from that of  
144 other swarming motility mutants as it is conditional and relieved when agar concentrations are  
145 reduced below standard conditions.

146 To determine how CwlQ might promote swarming, we sought to isolate spontaneous  
147 suppressors that restored motility to a *cw/Q* mutant upon prolonged incubation on a swarm agar  
148 plate. Unlike regulatory mutants defective in swarming (14,41,50,54,55), no spontaneous  
149 swarming-proficient suppressor ever emerged as a flare from the non-motile colony of the *cw/Q*  
150 mutant, even after 48 hours of incubation. To directly test the hypothesis that flagellar number  
151 was limiting in the *cw/Q* mutant, a double mutant was generated that was simultaneously  
152 defective in *cw/Q* and *smiA* encoding SmiA, a specific adaptor protein for the regulatory  
153 proteolysis of SwrA (46). Flagellar number and swarming increases when *smiA* is mutated (46),  
154 and the *cw/Q smiA* double mutant exhibited enhanced swarming motility relative to the *cw/Q*  
155 mutant alone (**Fig 1E**). We infer that the swarming defect in the absence of CwlQ is likely  
156 structural rather than regulatory, because like mutants defective in flagellar structure,

157 spontaneous suppressor mutants could not be isolated. We further infer that CwlQ is modestly  
158 defective in flagellar number, and swarming motility can be improved either by reducing surface  
159 hardness or by increasing flagellar number through mutation of SmiA.

160  
161 **CwlQ is secreted and swarming requires the CwlQ active site.** To further explore the  
162 mechanism of CwlQ, the CwlQ primary sequence was analyzed. CwlQ is predicted to have two  
163 domains: an N-terminal domain of unknown function and a C-terminal lytic transglycosylase  
164 domain previously shown to require a conserved glutamate for peptidoglycan hydrolase activity  
165 (40,56,57) (**Fig 4A**). To determine whether lytic transglycosylase activity was required for  
166 swarming, the conserved glutamate active site residue E148 was mutated to an alanine  
167 (*cwlQ<sup>E148A</sup>*) in the complementation construct and inserted at an ectopic locus (*amyE::P<sub>cwlQ</sub>-*  
168 *cwlQ<sup>E148A</sup>*) in a *cwlQ* mutant background. Introduction of the active site mutant allele conferred a  
169 defect in swarming motility that was somewhat more severe than the *cwlQ* mutant alone (**Fig**  
170 **1B**). Consistent with an enhanced defect, the strain that expressed the *cwlQ<sup>E148A</sup>* allele  
171 exhibited reduced swarm expansion rate relative to the *cwlQ* null mutant at all agar  
172 concentrations tested (**Fig 1C**). Finally, the defect appeared to be specific for swarming as the  
173 *cwlQ<sup>E148A</sup>* mutant exhibited swimming motility like the wild type (**Fig 3**). We conclude that CwlQ  
174 requires the lytic transglycosylase active site to promote swarming motility and that the  
175 presence of CwlQ may become inhibitory when the active site is abrogated.

176 As lytic transglycosylases operate on the extracellular substrate peptidoglycan, we  
177 hypothesized that CwlQ was secreted from the cytoplasm. In order to determine if CwlQ was  
178 secreted, cell lysates and TCA-precipitated supernatants were probed with anti-CwlQ and anti-  
179 SigA antibody in Western blot analysis (**Fig 4B**). The cytoplasmic housekeeping sigma factor  
180 SigA was used both as a loading control for the cytoplasmic fraction, and its absence in the  
181 supernatant indicated that protein release by spontaneous cell lysis was likely minimal (**Fig 4B**).  
182 CwlQ was present in cell lysates of wild type, absent in the *cwlQ* mutant, and was restored in



183 the CwlQ complementation strain (**Fig 4B**). Moreover, CwlQ protein was also detected when  
184 CwlQ<sup>E148A</sup> was expressed in an otherwise *cw/Q* mutant background suggesting that the active  
185 site mutant was not defective due to inherent protein instability (**Fig 4B**). There was no  
186 indication of extracellular CwlQ in the strains tested (**Fig 4B**).

187         A failure to detect extracellular CwlQ could either indicate that CwlQ was not secreted  
188 and functioned in the cytoplasm, or that it was secreted and subsequently degraded by  
189 extracellular proteases as has been shown for other flagellar proteins in *B. subtilis* (16,58). To  
190 determine whether secreted proteases contributed to extracellular CwlQ degradation, pellets  
191 and TCA-precipitated supernatants were harvested, resolved, and subjected to Western blot  
192 analysis in a variety of strains deleted for seven extracellular proteases ( $\Delta 7$ ) (58). The CwlQ  
193 protein was found in the both the pellet and TCA-precipitated supernatant fraction of the  
194 otherwise wild type, the *cw/Q* mutant complemented with wild type allele, and the *cw/Q* mutated  
195 complemented with the CwlQ<sup>E148A</sup> allele when the seven extracellular proteases were absent  
196 (**Fig 4C**). We conclude that CwlQ is a secreted protein that cannot normally be detected in the  
197 supernatant due to extracellular degradation by one or more of the proteases secreted by *B.*  
198 *subtilis*.

199         The primary sequence of CwlQ does not encode signal sequences consistent with either  
200 SEC-dependent or TAT-dependent secretion (59-62). One way in which CwlQ could be  
201 secreted in manner independent of a known signal sequence is if CwlQ was secreted by the  
202 type III secretion system that resides at the core of the flagellum (63-65). To determine whether  
203 CwlQ was secreted by the flagellar type III system, cells were mutated for the basal body  
204 protein FliF, a protein previously shown to be essential for flagellar-mediated secretion (58).  
205 CwlQ protein was detected in the cytoplasm but not the supernatant of the *fliF*  $\Delta 7$  mutant (**Fig**  
206 **4D**). The absence of CwlQ from the supernatant could be consistent with a failure of secretion,  
207 but many genes that are required for flagellar motility are under the regulation of the alternative  
208 sigma factor SigD, and SigD activity is inhibited by the anti-sigma factor FlgM when *fliF* is

209 mutated (58,66-69). Moreover, the total amount of CwlQ protein appeared to be reduced in the  
210 *fliF*  $\Delta$ 7 mutant perhaps consistent with an expression defect (**Fig 4D**). Thus, if *cwI*Q was  
211 expressed as part of the flagellar regulon, it would be difficult to distinguish whether the absence  
212 of CwlQ protein in the supernatant in a *fliF* mutant was either due to a failure of secretion or a  
213 failure of expression, or both.

214 To determine whether the expression of *cwI*Q was impaired in a *fliF* mutant, a  
215 transcriptional reporter construct was generated in which the *cwI*Q promoter region ( $P_{cwI}Q$ ) was  
216 fused to the *lacZ* gene encoding  $\beta$ -galactosidase and inserted at an ectopic site (*amyE*:: $P_{cwI}Q$ -  
217 *lacZ*). Mutation of *fliF* reduced the expression of the  $P_{cwI}Q$ -*lacZ* reporter 10-fold (**Fig 5**).  
218 Consistent with the *fliF* defect, expression of *cwI*Q was found to be SigD-dependent and *cwI*Q  
219 expression was abolished when SigD was mutated (**Fig 5**). Moreover, mutation of *flgM*  
220 increased  $P_{cwI}Q$  expression above that of the wild type, and  $P_{cwI}Q$  expression was restored to the  
221 *fliF* mutant when *flgM* was also disrupted (**Fig 5**). We conclude that *cwI*Q is a SigD-dependent  
222 gene and the lack of extracellular CwlQ in the absence of FliF may have been due, at least in  
223 part, to a protein expression failure. To determine whether CwlQ was secreted in the *fliF* mutant  
224 without the confounding expression defect, Western blot analyses were conducted on cells  
225 mutated for *flgM* and a *fliF flgM* double mutant in the  $\Delta$ 7 background. CwlQ secretion was  
226 dramatically reduced in the *fliF flgM* double mutant background relative to the *flgM* single mutant  
227 alone (**Fig 4D**). We note that the cytoplasmic control SigA protein also appeared in the  
228 supernatant of the *fliF flgM* double mutant and thus the small amount of CwlQ that appeared to  
229 be secreted may have been spuriously released by cellular lysis. We conclude that CwlQ is  
230 primarily, and likely exclusively, secreted in a manner that depends on FliF and the flagellar type  
231 III secretion system.

232 The signal sequence that directs proteins to be secreted by type III secretion system is  
233 poorly-understood but appears to be contained within the N-terminus of a secreted protein (63-  
234 65). To determine whether the N-terminal domain of CwlQ was required for secretion, three

235 separate in-frame markerless deletions were generated that separately deleted amino acids 2-  
236 63 (deleting the entire N-terminus), and 2-35 and 36-63 (deleting the first and second halves of  
237 the N-terminus respectively) in the *cw/Q* complementation construct (**Fig 4A**).  $CwIQ^{\Delta 2-63}$  and  
238  $CwIQ^{\Delta 2-35}$  both displayed a defect in swarming motility comparable to that of the *cw/Q* null  
239 mutation when introduced to a strain deleted for the native copy of *cw/Q*, but  $CwIQ^{\Delta 36-63}$   
240 swarmed like wild type albeit with an extended lag period (**Fig 1F**). When  $CwIQ^{\Delta 2-63}$  was  
241 expressed in a  $\Delta 7$  strain deleted for extracellular proteases, no protein was detected suggesting  
242 that the deletion of the entire N-terminal domain caused severe defects in protein stability (**Fig**  
243 **4E**).  $CwIQ^{\Delta 2-35}$  was detected in the cell pellet but not the supernatant suggesting that the N-  
244 terminus of *CwIQ* was required for secretion (**Fig 4E**). Finally  $CwIQ^{\Delta 36-63}$  hyper-accumulated in  
245 the cytoplasm with a reduced level of secretion that might account for the prolonged rescued of  
246 swarming to the *cw/Q* mutant (**Fig 4E**). We conclude that the N-terminus of *CwIQ* is important  
247 for its secretion and protein stability.

248

249 **CwIQ and CwIO are not synergistically required for flagellar assembly.** Cells mutated for  
250 *cw/Q* alone exhibited a conditional defect in swarming motility and were proficient in flagellar  
251 assembly. One reason that a peptidoglycan hydrolase mutant might fail to have flagellar  
252 assembly defect is if other peptidoglycan hydrolases with which it is co-expressed were  
253 redundant in supporting the activity. Since *cw/Q* is a fourth secreted peptidoglycan hydrolase  
254 expressed as part of the SigD-regulon (41), a quadruple mutant was generated defective in  
255 *cw/Q lytC lytD lytF* in a background that expressed a version of the flagellar filament that could  
256 be fluorescently labeled. The quadruple mutant was still proficient for flagellar synthesis (**Fig**  
257 **6A**). Next, a *cw/O* mutation was introduced to the *cw/Q lytC lytD lytF* quadruple mutant and the  
258 resulting quintuple mutant showed increased loss of cell integrity (by an increase in frequency of  
259 cytoplasmic staining with the maleimide dye), defects in cell shape, and reduced flagellar  
260 filament number (**Fig 6B**). The *cw/O* mutant alone did not exhibit a severe reduction in flagellar

261 filament number (**Fig 6C**), and neither did a *cw/O cw/Q* (**Fig 6D**) nor a *cw/O lytC* double mutant  
262 (**Fig 6E**). We conclude that neither CwIQ nor CwIO are essential for flagellar assembly and that  
263 mutation of as many as five peptidoglycan hydrolases is required to reduce, but not abolish,  
264 flagellar synthesis and/or retention.  
265  
266

## 267 Discussion

268 Flagella are elaborate molecular nanomachines, which when assembled span the  
269 plasma membrane and all layers of the cell envelope including the peptidoglycan (PG) wall.  
270 The macromolecular structure of PG is porous with pores approximately 2-7 nm in diameter (22-  
271 26), and peptidoglycan remodeling by dedicated hydrolases is thought necessary to allow  
272 insertion of the 8-13 nm flagellar rod (6,27,28). Gram negative bacteria often encode a PG  
273 hydrolase that has a second function in flagellar rod polymerization such that as the rod extends  
274 towards the PG, the hydrolase degrades the wall and permits rod passage (31,33,34). Gram  
275 positive bacteria are surrounded by PG many layers thick but to date, no PG hydrolase has  
276 been shown to be required for flagellar assembly. Here we took a reverse-genetic, candidate-  
277 gene approach to identify PG hydrolases required for flagellar assembly in *B. subtilis* and found  
278 that mutation of two hydrolases CwlO and CwlQ resulted in defects in swarming motility.  
279 Neither mutant was defective in flagellar assembly however, either when mutated singly or  
280 when mutated in combination with four other PG hydrolases. To better understand the role of  
281 PG hydrolases in promoting motility, we focused on the less well-understood CwlQ.

282 Cells mutated for CwlQ were defective for swarming motility under standard conditions  
283 but the reason for the defect is unclear. We suspect that CwlQ plays a structural role in  
284 swarming as, unlike the case of mutants defective in swarming for regulatory reasons, no  
285 spontaneous suppressor mutants were isolated that restored swarming to the *cwlQ* mutant.  
286 Perhaps consistent with a structural role, there appeared to be a qualitative reduction in flagellar  
287 filaments and we often saw evidence of filaments dissociated from the cell body in fluorescent  
288 micrographs, even in liquid-grown culture, of the *cwlQ* mutant. Perhaps the absence of CwlQ  
289 creates a local environment in the peptidoglycan that promotes fracture/instability of the rod.  
290 Additionally, the *cwlQ* mutant exhibited a statistically significant reduction in both the number of  
291 flagellar basal bodies and hooks, and swarming was somewhat improved by additional mutation  
292 of SmiA, a protein that restricts flagellar number. How or why basal body number might be

293 reduced in the absence of CwlQ is unclear however, as basal body assembly is thought to  
294 precede interaction with the peptidoglycan. Finally, swarming could be restored to the *cwlQ*  
295 mutant simply by reducing the agar concentration of the surface. Previous work indicated that  
296 the transition to swarming motility in *B. subtilis* requires that cells exceed a threshold flagellar  
297 density (46) and cells mutated for CwlQ, when introduced to a surface, may be below that level  
298 for 0.7% agar, but above a reduced level needed for softer agars.

299         While the mechanism by which CwlQ promotes swarming is unknown, here we make a  
300 number of observations that connects the function of CwlQ to flagellar structure and/or activity.  
301 First, a conserved and biochemically-determined active site residue for CwlQ lytic  
302 transglycosylase activity (40) was required to promote swarming and when mutated caused  
303 even more severe defect than deletion of entire gene, perhaps suggesting that unproductive  
304 binding of CwlQ to PG becomes inhibitory. Second, CwlQ was found to be part of the flagellar  
305 regulon under strict control of the flagellar sigma factor SigD, and was thus co-expressed with,  
306 among other proteins, the structural subunits of the distal rod and flagellar filament. Third, CwlQ  
307 was secreted in a manner dependent on the type III secretion system housed within the  
308 flagellum and its export was directed by information encoded within the poorly-conserved N-  
309 terminal domain. Thus, CwlQ promoted swarming motility as a lytic transglycosylase, was co-  
310 expressed with flagellar structural subunits and was secreted by the flagellum. Every  
311 observation above makes CwlQ seem an ideal candidate to be a PG remodeling hydrolase for  
312 flagellar assembly and yet, flagella were synthesized in its absence.

313         One reason, often invoked, for why mutation of a PG hydrolase fails to confer phenotype  
314 is the idea of redundancy, that the genome encodes another peptidoglycan hydrolase with  
315 redundant activity or that otherwise compensates for the absence. At the most basic level, all  
316 PG hydrolases are redundant as they all operate on the same substrate, peptidoglycan, but  
317 what distinguishes them is how their activity is restricted in both space and time. Possible  
318 candidates for redundant activity with CwlQ are the LytC, LytD, and LytF hydrolases with which

319 it is co-expressed and the CwIO PG hydrolase that promotes cell elongation and is required for  
320 full swarming motility. Simultaneous mutation of all five hydrolases reduced, but failed to  
321 abolish, flagellar production. The quintuple mutant also showed signs of reduced cellular  
322 integrity in the form of frequently misshapen and lysed cells, and thus the effect of the quintuple  
323 deletion may be less specific for flagellar synthesis and more an indication of generalized  
324 envelope damage. Whatever the case, the identity of the specific PG hydrolase dedicated to  
325 flagellar transit of the wall during assembly in *B. subtilis*, remains unknown.

326

327

328

## 329 MATERIALS AND METHODS

330 **Strains and growth conditions:** *B. subtilis* strains were grown in Luria-Bertani (LB) (10 g  
331 tryptone, 5 g yeast extract, 5 g NaCl per L) broth or on LB plates fortified with 1.5% Bacto agar  
332 at 37°C. When appropriate, antibiotics were included at the following concentrations: 10 µg/ml  
333 tetracycline, 100 µg/ml spectinomycin, 5 µg/ml chloramphenicol, 5 µg/ml kanamycin, and 1  
334 µg/ml erythromycin plus 25 µg/ml lincomycin (*mls*). Isopropyl β-D-thiogalactopyranoside (IPTG,  
335 Sigma) was added to the medium at the indicated concentration when appropriate.

336

337 **Strain construction.** All constructs were either first introduced by transformation by natural  
338 competence into DK1042 (a competent derivative of strain 3610) (70), or transformed into the  
339 domesticated strain PY79 and transduced in 3610 using SPP1-mediated generalized phage  
340 transduction (71). All strains used in this study are listed in Table 2. All primers used in this  
341 study are listed in Table S2. All plasmids used in this study are listed in Table S3.

342

343 **Antibiotic resistance cassette insertion/deletion mutations.** For each gene mutated, a PCR  
344 fragment was amplified upstream of the gene and downstream of the gene using the indicated  
345 primer pairs. Next, the antibiotic resistance cassette amplified from either pDG1515 (for  
346 tetracycline resistance), pDG780 (for kanamycin resistance) or pAH52 (for macrolide,  
347 lincomycin, streptomycin “*mls*” resistance) using primer pair 3250/3251 (72,73). Finally the  
348 three products were assembled by Gibson Isothermal Assembly (ITA) (74) and transformed into  
349 DK1042 by natural transformation. Finally, colonies containing the antibiotic resistance marker  
350 replacement mutant were determined by PCR amplification over the top the allele using the far  
351 upstream and far downstream primers used to generate the corresponding arms of adjacent  
352 DNA. The following primers were used to generate the indicated mutants: *cw/Q*  
353 (3695/3696::3697/3698); *cw/S* (3699/3700::3701/3702); *lytE* (3670/3671::3672/3673); *lytG*  
354 (3707/3708::3709/3710); *yqgT* (5497/5498::5499/5500); *yocH* (5501/5502::5503/5504); *yqgA*



355 (5112/5113::5114/5115); *yqiL* (6425/6426::6427/6428); and *yrvJ* (4618/4619::4620/4621).

356

357  **$\Delta cw/Q$  in-frame markerless deletion.** To generate the  $\Delta cw/Q$  in frame marker-less deletion  
358 construct, the region upstream of *cw/Q* was PCR amplified using the primer pair 4118/4120 and  
359 the region downstream of *cw/Q* was PCR amplified using the primer pair 4119/4121. The two  
360 fragments were combined with Sall-digested pMiniMAD which carries a temperature sensitive  
361 origin of replication and an erythromycin resistance cassette (75) and were assembled by ITA to  
362 generate plasmid pSS5. The pSS5 plasmid was passaged through the *recA*<sup>+</sup> *E. coli* strain TG1  
363 before being transformed into DK1042 and selecting for *mls* resistance at the non-permissive  
364 temperature for plasmid replication, 37°C. To evict the plasmid, the strain was incubated in 3ml  
365 LB broth at a permissive temperature for plasmid replication (22°C) for 14 hours, diluted 30-fold  
366 in fresh LB broth, then serially diluted and plated on LB agar at 37°C. Individual colonies were  
367 patched on LB plates and LB plates containing *mls* to identify *mls* sensitive colonies that had  
368 evicted the plasmid. Chromosomal DNA from colonies that had excised the plasmid was  
369 purified and screened by PCR using primers 4118/4121 to determine which isolate had retained  
370 the  $\Delta cw/Q$  allele.

371

372  **$\Delta cw/O$  markerless deletion.** A *cw/O::kan* mutant allele generated from high throughput  
373 directed mutagenesis (76) was requested from the Bacillus Genetic Stock Center (The Ohio  
374 State University, Columbus OH). The kanamycin resistance cassettes is flanked by lox  
375 recombination sites and was excised by transformation with plasmid pDR244 encoding the *cre*  
376 recombinase and a spectinomycin resistance cassette by plating on LB containing  
377 spectinomycin at 30°C. Colonies were restreaked on LB, grown at 37°C and deletion of *cw/O* was  
378 determined by PCR product length polymorphism using primers 4741/4744.

379

380 ***cw/Q* complementation constructs.** To generate the *amyE::P<sub>cw/Q</sub>-cw/Q* complementation

381 construct (pSS9), a PCR product containing the *cwI/Q* coding region plus 393 base pairs of  
382 upstream sequence was amplified from *B. subtilis* 3610 chromosomal DNA using the primer pair  
383 4373/4374, digested with *Bam*HI and *Eco*RI and cloned into the *Bam*HI and *Eco*RI sites of  
384 pAH25 containing a polylinker and spectinomycin resistance cassette between two arms of the  
385 *amyE* (generous gift of Dr. Amy Camp, Mount Holyoke College).

386 The active site mutant *amyE::P<sub>cwI/Q</sub>-cwI/Q<sup>E148A</sup>* allele construct was generated using a  
387 modified ITA protocol. Briefly, the region upstream of the complementation construct of *cwI/Q*  
388 (DK3586) was PCR amplified using the primer pair 953/4888 and the region downstream of the  
389 complementation strain was PCR amplified using the primer pair 4887/954. The two fragments  
390 were assembled by isothermal assembly and retransformed into *B. subtilis* selecting for  
391 spectinomycin resistance. The N-terminal *cwI/Q* deletion constructs were built using a similar  
392 approach with the indicated primer pair sets: *amyE::P<sub>cwI/Q</sub>-cwI/Q<sup>Δ2-63</sup>* (953/7304::7303/954),  
393 *amyE::P<sub>cwI/Q</sub>-cwI/Q<sup>Δ2-35</sup>* (953/7389::7388/954), and *amyE::P<sub>cwI/Q</sub>-cwI/Q<sup>Δ36-63</sup>* (953/7387::7386/954).

394  
395 ***P<sub>cwI/Q</sub>-lacZ* reporter construct.** To generate the *P<sub>cwI/Q</sub>-lacZ* reporter construct pSS2, the *P<sub>cwI/Q</sub>*  
396 promoter was amplified from *B. subtilis* 3610 chromosomal DNA using the primers 4114/4115,  
397 digested with *Eco*RI and *Bam*HI and cloned into the *Eco*RI and *Bam*HI sites of plasmid  
398 pDG268, which carries a chloramphenicol-resistance marker and a polylinker upstream of the  
399 *lacZ* gene between two arms of the *amyE* gene (77).

400  
401 **CwI/Q-His expression construct and CwI/Q purification.** To generate the CwI/Q-6His  
402 expression plasmid pSS14, the *cwI/Q* gene was PCR amplified 3610 chromosomal DNA with  
403 primers 4757/4758, digested with *Eco*RI and *Hin*DIII and cloned into the *Eco*RI and *Hin*DIII sites  
404 of pET21a (Novagen). Next, pSS14 was transformed into Rosetta gami *E. coli*, grown to an  
405 OD<sub>600</sub> of 0.6 in 1 liter of LB broth, induced with 1 mM IPTG, and grown for 16 h at 16°C. Cells  
406 were pelleted and resuspended at room temperature in lysis buffer (50 mM Tris [pH 8.0], 300

407 mM NaCl, 10% glycerol) and treated with lysozyme and DNase I, and the lysis was carried out  
408 using a pressurized cell homogenizer. The lysed cells were centrifuged at 15,000 rpm for 30  
409 min. The cleared supernatants were combined with Ni-NTA resin (Novagen) and immediately  
410 poured onto a 1-cm separation column (Bio-Rad); the resin was allowed to pack and was  
411 washed with lysis buffer. CwlQ-6His bound to the resin was then eluted with elution buffer (50  
412 mM Tris [pH 8.0], 300 mM NaCl, 10% glycerol, 100 mM imidazole). The elution fractions were  
413 then run on SDS-PAGE gels and appropriate fractions were then pooled and concentrated to 2  
414 ml. The final purification of CwlQ-6His protein was conducted via size exclusion  
415 chromatography on a Superdex 75 16/60 (GE Healthcare) column using gel filtration buffer (25  
416 mM Tris [pH 8.0], 300 mM NaCl, 10% glycerol) and submitted to Cocalico (Stephens, PA), for  
417 injection into rabbits and polyclonal antibody generation.

418  
419 **Isothermal assembly reaction.** First a 5X ITA stock mixture was generated (500 mM Tris-HCL  
420 (pH 7.5), 50 mM MgCl<sub>2</sub>, 50 mM DTT (Bio-Rad), 31.25 mM PEG-8000 (Fisher Scientific), 5.02  
421 mM NAD (Sigma Aldrich), and 1 mM of each dNTP (New England BioLabs)), aliquoted and  
422 stored at -80° C. An assembly master mixture was made by combining prepared 5X isothermal  
423 assembly reaction buffer (131 mM Tris-HCl, 13.1 mM MgCl<sub>2</sub>, 13.1 mM DTT, 8.21 mM PEG-  
424 8000, 1.32 mM NAD, and 0.26 mM each dNTP) with Phusion DNA polymerase (New England  
425 BioLabs) (0.033 units/μL), T5 exonuclease diluted 1:5 with 5X reaction buffer (New England  
426 BioLabs) (0.01 units/μL), Taq DNA ligase (New England BioLabs) (5328 units/μL), and  
427 additional dNTPs (267 μM). The master mix was aliquoted as 15 μl and stored at -80°C. DNA  
428 fragments were combined at equimolar amounts to a total volume of 5 μL and added to a 15 μl  
429 aliquot of prepared master mix. The reaction was incubated for 60 minutes at 50° C.

430  
431 **SPP1 phage transduction.** To 0.1 ml of dense culture grown in TY broth (LB broth

432 supplemented after autoclaving with 10 mM MgSO<sub>4</sub> and 100 μM MnSO<sub>4</sub>), serial dilutions of  
433 SPP1 phage stock were added and statically incubated for 15 minutes at 37°C. To each  
434 mixture, 3 ml TYSA (molten TY supplemented with 0.5% agar) was added, poured atop fresh  
435 TY plates, and incubated at 37°C overnight. Top agar from the plate containing near confluent  
436 plaques was harvested by scraping into a 50 ml conical tube, vortexed, and centrifuged at 5,000  
437 x g for 10 minutes. The supernatant was treated with 25 μg/ml DNase final concentration before  
438 being passed through a 0.45 μm syringe filter and stored at 4°C. Recipient cells were grown to  
439 stationary phase in 2 ml TY broth at 37°C. 0.9 ml cells were mixed with 5 μl of SPP1 donor  
440 phage stock. 9 ml of TY broth was added to the mixture and allowed to stand at 37°C for 30  
441 minutes. The transduction mixture was then centrifuged at 5,000 x g for 10 minutes, the  
442 supernatant was discarded, and the pellet was resuspended in the remaining volume. 100 μl of  
443 cell suspension was then plated on TY fortified with 1.5% agar, the appropriate antibiotic, and  
444 10 mM sodium citrate.

445  
446 **Motility assays.** For the swarm expansion assay, cells were grown to mid-log phase at 37°C in  
447 LB broth and resuspended to 10 OD<sub>600</sub> in pH 8.0 PBS buffer (137 mM NaCl, 2.7 mM KCl, 10  
448 mM Na<sub>2</sub>HPO<sub>4</sub>, and 2 mM KH<sub>2</sub>PO<sub>4</sub>) containing 0.5% India ink (Higgins). Freshly prepared LB  
449 containing 0.7% Bacto agar (25 ml/plate) (For percent agar concentration assay the freshly  
450 prepared LB containing between 0.5% to 0.9%) was dried for 10 minutes in a laminar flow hood,  
451 centrally inoculated with 10 μl of the cell suspension, dried for another 10 minutes, and  
452 incubated at 37°C. The India ink demarks the origin of the colony and the swarm radius was  
453 measured relative to the origin. For consistency, an axis was drawn on the back of the plate  
454 and swarm radii measurements were taken along this transect.

455 For swim assays, cells were grown to mid-log phase at 37°C in LB broth and  
456 resuspended to 10 OD<sub>600</sub> in pH 8.0 PBS buffer (137 mM NaCl, 2.7 mM KCl, 10 mM Na<sub>2</sub>HPO<sub>4</sub>,  
457 and 2 mM KH<sub>2</sub>PO<sub>4</sub>) 10 ul of culture were inoculated into the agar. Freshly prepared LB

458 containing 0.3% Bacto agar (25 ml/plate) was dried for 10 minutes in a laminar flow hood,  
459 centrally inoculated with 10  $\mu$ l of the cell suspension, dried for another 10 minutes, and  
460 incubated at 37°C. Plates were visualized with a BioRad Geldoc system and digitally captured  
461 using BioRad Quantity One software.

462  
463 **Western blotting.** *B. subtilis* strains were grown in LB broth to OD<sub>600</sub> ~0.5, 10 ml was  
464 harvested by centrifugation, and resuspended to 100 OD<sub>600</sub> in Lysis buffer (20 mM Tris pH 7.0,  
465 10 mM EDTA, 1 mg/ml lysozyme, 10  $\mu$ g/ml DNase I, 100  $\mu$ g/ml RNase I, 1 mM PMSF) and  
466 incubated 30 minutes at 37°C. Each lysate was then mixed with the appropriate amount of 6x  
467 SDS loading dye to dilute the loading dye to 1x concentration. Samples were separated by 12%  
468 Sodium dodecyl sulfate-polyacrylamide gel electrophoresis (SDS-PAGE). The proteins were  
469 electroblotted onto nitrocellulose and developed with a 1:1,000 dilution of (anti-CwlQ) or  
470 1:80,000 dilution of (anti-SigA) of primary antibody and a 1:10,000 dilution secondary antibody  
471 (horseradish peroxidase-conjugated goat anti-rabbit immunoglobulin G). Immunoblot was  
472 developed using the Immun-Star HRP developer kit (Bio-Rad).

473 For experiments involving trichloroacetic acid (TCA) precipitation, the 10 ml of  
474 supernatant was saved during pelleting step, combined with 1 ml 0.015% sodium deoxycholate,  
475 vortexed and incubated 10 minutes at room temperature. Next, 500  $\mu$ l of ice cold TCA was  
476 added, the mixture was vortexed and incubated on ice for 2 hours. The supernatant was  
477 precipitated by centrifugation at 30,000 x g for 10 minutes at 4°C. The pellet was resuspended  
478 in 1 ml ice cold acetone and repelleted in a tabletop centrifuge. Finally the pellet was  
479 resuspended in the same amount of 1X protein sample buffer as the corresponding pellet.

480  
481 **Microscopy.** Fluorescence microscopy was performed with a Nikon 80i microscope along with  
482 a phase contrast objective Nikon Plan Apo 100X and an Excite 120 metal halide lamp. Alexa  
483 Fluor 594 C<sub>5</sub> maleimide fluorescent signals were visualized with a C-FL HYQ Texas Red Filter

484 Cube (excitation filter 532-587 nm, barrier filter >590 nm). GFP was visualized using a C-FL  
485 HYQ FITC Filter Cube (FITC, excitation filter 460-500 nm, barrier filter 515-550 nm). YFP was  
486 visualized using a C\_FL HYQ YFP Filter Cube (excitation filter 490-510 nm, barrier filter 515-  
487 550 nm). TMA-DPH fluorescent signal was visualized using a UB-2E/C DAPI Filter Cube  
488 (excitation filter 340-380 nm, barrier filter 435-485 nm). Images were captured with a  
489 Photometrics Coolsnap HQ<sup>2</sup> camera in black and white, false colored and superimposed using  
490 Metamorph image software.

491 For super-resolution microscopy using structured illumination the OMX 3D-SIM Super  
492 Resolution system at Indiana University Bloomington Light Microscopy Imaging Center was  
493 used. Super-resolution microscopy was performed using a 1.4NA Olympus 100X oil objective.  
494 FM4-64 was visualized using laser line 561nm and emission filter 609-654nm, and Alexa Fluor  
495 488 was visualized using laser line 488nm and emission filter 500-550nm. Images were  
496 captured by Photometrics Cascade II EMCCD camera and processed by SoftWoRx imaging  
497 software (Applied Precision). For counting hooks, images reconstructed with SoftWoRx were  
498 used in Imaris (Bitplane) to determine the number of FlgE<sup>T123C</sup> foci on the surface of each cell.  
499 The spots feature labelled each FlgE<sup>T123C</sup> foci by the search parameter of identifying spots of 1  
500  $\mu$ M in the 488 wavelength and we verified by eye that the spots labelling identified bonafide foci  
501 on the cell surface. The hook count datasets were plotted against cell length (micron) using  
502 IMARIS software.

503

## 504 **ACKNOWLEDGEMENTS**

505 We thank Felix Dempwolff for intellectual and technical support, as well as strain construction.

506 The work was funded by the National Institutes of Health R35 grant GM131783 to DBK.

507

508 **Table 1 – *B. subtilis* candidate PG hydrolase genes**

| Gene                      | Product annotation          | Swarming | Excluded                                     |
|---------------------------|-----------------------------|----------|----------------------------------------------|
| <b>Not tested</b>         |                             |          |                                              |
| <i>blyA</i>               | Muramidase                  | NT       | HTE: SPβ prophage (78)                       |
| <i>cwlA</i>               | Muramidase                  | NT       | HTE: Skin element (79)                       |
| <i>cwlC</i>               | Muramidase                  | NT       | Sporulation (80,81)                          |
| <i>cwlD</i>               | Muramidase                  | NT       | Sporulation ( $\sigma^E$ , $\sigma^G$ ) (82) |
| <i>cwlH</i>               | Muramidase                  | NT       | Sporulation ( $\sigma^K$ ) (83)              |
| <i>cwlP</i>               | Muramidase/endopeptidase    | NT       | HTE: SPβ prophage (84)                       |
| <i>cwlT</i>               | Muramidase/endopeptidase    | NT       | HTE: ICE element (85,86)                     |
| <i>lytH</i>               | Endopeptidase               | NT       | Sporulation ( $\sigma^K$ ) (87)              |
| <i>spoIID</i>             | Lytic transglycosidase      | NT       | Sporulation ( $\sigma^E$ ) (88,89)           |
| <i>spoIIP</i>             | Muramidase/endopeptidase    | NT       | Sporulation ( $\sigma^E$ ) (89,90)           |
| <i>xlyA</i>               | Muramidase                  | NT       | HTE: PBSX prophage (91)                      |
| <i>xlyB</i>               | Muramidase (putative)       | NT       | HTE: PBSX prophage                           |
| <b>Wild type swarming</b> |                             |          |                                              |
| <i>cwlK</i>               | L,D-endopeptidase           | +++      | (92)                                         |
| <i>lytD</i>               | N-acetylglucosaminidase     | +++      | previously tested (41,93,94)                 |
| <i>lytE</i>               | Endopeptidase               | +++      | (95-97)                                      |
| <i>lytF</i>               | Endopeptidase               | +++      | previously tested (14,98,99)                 |
| <i>lytG</i>               | N-acetylglucosaminidase     | +++      | (100)                                        |
| <i>cwlS</i>               | Endopeptidase               | +++      | (95,101)                                     |
| <i>yocH</i>               | Muramidase                  | +++      | (102)                                        |
| <i>yqgA</i>               | Wall-associated protein     | +++      | (103)                                        |
| <i>yqgT</i>               | Endopeptidase (putative)    | +++      |                                              |
| <i>yqil</i>               | Muramidase (putative)       | +++      |                                              |
| <i>yrvJ</i>               | Muramidase (putative)       | +++      |                                              |
| <b>Swarming defect</b>    |                             |          |                                              |
| <i>cwlO</i>               | Endopeptidase               | +        | (38,39)                                      |
| <i>cwlQ</i>               | Muramidase/transglycosylase | -        | (40)                                         |
| <i>lytC</i>               | Muramidase                  | +        | previously tested (41,104,105)               |

509

510 **Table 2: Strains**

511

| Strain | Genotype                                                                                                                                                                                  |
|--------|-------------------------------------------------------------------------------------------------------------------------------------------------------------------------------------------|
| DK374  | <i>srfAC::Tn10 spec epsH::tet</i>                                                                                                                                                         |
| DK378  | $\Delta$ <i>hag srfAC::Tn10 spec epsH::tet</i>                                                                                                                                            |
| DK1023 | <i>cwIS::tet</i>                                                                                                                                                                          |
| DK1024 | <i>lytE::kan</i>                                                                                                                                                                          |
| DK1042 | wild type                                                                                                                                                                                 |
| DK1047 | $\Delta$ <i>fliM cwIQ::kan amyE::P<sub>fla/che</sub>-fliM-GFP spec</i>                                                                                                                    |
| DK1128 | <i>lytG::kan</i>                                                                                                                                                                          |
| DK1744 | <i>cwIQ::kan</i>                                                                                                                                                                          |
| DK1747 | <i>cwIQ::mIs</i>                                                                                                                                                                          |
| DK1770 | $\Delta$ <i>hag cwIQ::kan amyE::P<sub>haq</sub>-hag<sup>T209C</sup> spec</i>                                                                                                              |
| DK1771 | $\Delta$ <i>flgE cwIQ::kan amyE::P<sub>fla/che</sub>-flgE<sup>T123C</sup> cat</i>                                                                                                         |
| DK2185 | <i>amyE::P<sub>cwIQ</sub>-lacZ cat</i>                                                                                                                                                    |
| DK2207 | <i>sigD::tet amyE::P<sub>cwIQ</sub>-lacZ cat</i>                                                                                                                                          |
| DK2347 | <i>flgM::tet amyE::P<sub>cwIQ</sub>-lacZ cat</i>                                                                                                                                          |
| DK2491 | $\Delta$ <i>cwIQ srfAC::Tn10 spec epsH::tet</i>                                                                                                                                           |
| DK3579 | <i>yrvJ::kan</i>                                                                                                                                                                          |
| DK3586 | <i>cwIQ::kan amyE::P<sub>cwIQ</sub>-cwIQ spec</i>                                                                                                                                         |
| DK4127 | <i>cwIQ::kan amyE::P<sub>cwIQ</sub>-cwIQ<sup>E148A</sup> spec</i>                                                                                                                         |
| DK4677 | <i>yocH::kan</i>                                                                                                                                                                          |
| DK4678 | <i>yqgT::kan</i>                                                                                                                                                                          |
| DK5150 | $\Delta$ 7 $\Delta$ <i>fliF</i> $\Delta$ <i>flgM</i>                                                                                                                                      |
| DK5178 | <i>cwIK::spec</i>                                                                                                                                                                         |
| DK6432 | <i>yqil::kan</i>                                                                                                                                                                          |
| DK6611 | <i>yqgA::spec</i>                                                                                                                                                                         |
| DK7051 | <i>cwIQ::kan srfAA::mIs <math>\Delta</math>epsH amyE::P<sub>cwIQ</sub>-cwIQ<sup>E148A</sup> spec</i>                                                                                      |
| DK7570 | $\Delta$ <i>cwIQ <math>\Delta</math>lytC <math>\Delta</math>lytD <math>\Delta</math>lytF amyE::P<sub>haq</sub>-hag<sup>T209C</sup> spec</i>                                               |
| DK8018 | <i>cwIQ::mIs smiA::TnYLB kan</i>                                                                                                                                                          |
| DK8462 | <i>cwIO::kan</i>                                                                                                                                                                          |
| DK8470 | <i>cwIQ::kan amyE::P<sub>cwIQ</sub>-cwIQ<sup><math>\Delta</math>2-63</sup> spec</i>                                                                                                       |
| DK8471 | <i>cwIQ::kan amyE::P<sub>cwIQ</sub>-cwIQ<sup><math>\Delta</math>2-35</sup> spec</i>                                                                                                       |
| DK8472 | <i>cwIQ::kan amyE::P<sub>cwIQ</sub>-cwIQ<sup><math>\Delta</math>36-63</sup> spec</i>                                                                                                      |
| DK8664 | $\Delta$ <i>fliF amyE::P<sub>cwIQ</sub>-lacZ cat</i>                                                                                                                                      |
| DK8665 | $\Delta$ <i>fliF flgM::tet amyE::P<sub>cwIQ</sub>-lacZ cat</i>                                                                                                                            |
| DK8697 | $\Delta$ 7 <i>cwIQ::kan amyE::P<sub>cwIQ</sub>-cwIQ spec</i>                                                                                                                              |
| DK8698 | $\Delta$ 7 <i>cwIQ::kan amyE::P<sub>cwIQ</sub>-cwIQ<sup>E148A</sup> spec</i>                                                                                                              |
| DK8699 | $\Delta$ 7 <i>cwIQ::kan amyE::P<sub>cwIQ</sub>-cwIQ<sup><math>\Delta</math>2-63</sup> spec</i>                                                                                            |
| DK8700 | $\Delta$ 7 <i>cwIQ::kan amyE::P<sub>cwIQ</sub>-cwIQ<sup><math>\Delta</math>2-35</sup> spec</i>                                                                                            |
| DK8701 | $\Delta$ 7 <i>cwIQ::kan amyE::P<sub>cwIQ</sub>-cwIQ<sup><math>\Delta</math>35-63</sup> spec</i>                                                                                           |
| DK8783 | $\Delta$ <i>cwIQ <math>\Delta</math>cwIO amyE::P<sub>haq</sub>-hag<sup>T209C</sup> spec</i>                                                                                               |
| DK8787 | $\Delta$ <i>cwIO <math>\Delta</math>lytC amyE::P<sub>haq</sub>-hag<sup>T209C</sup> spec</i>                                                                                               |
| DK8815 | $\Delta$ <i>cwIQ <math>\Delta</math>cwIO <math>\Delta</math>lytC <math>\Delta</math>lytD <math>\Delta</math>lytF amyE::P<sub>haq</sub>-hag<sup>T209C</sup> spec</i>                       |
| DK8816 | $\Delta$ <i>cwIO amyE::P<sub>haq</sub>-hag<sup>T209C</sup> spec</i>                                                                                                                       |
| DK8842 | <i>cwIO::kan ycgO::P<sub>spank</sub>-5'UTR-cwIO spec</i>                                                                                                                                  |
| DS1919 | $\Delta$ <i>hag amyE::P<sub>haq</sub>-hag<sup>T209C</sup> spec</i>                                                                                                                        |
| DS2415 | $\Delta$ <i>swrA</i>                                                                                                                                                                      |
| DS6329 | $\Delta$ 7 ( <i><math>\Delta</math>mpr <math>\Delta</math>aprE <math>\Delta</math>nprE <math>\Delta</math>bpr <math>\Delta</math>vpr <math>\Delta</math>epf <math>\Delta</math>wprA</i> ) |
| DS6657 | $\Delta$ <i>swrD</i>                                                                                                                                                                      |
| DS6871 | $\Delta$ 7 $\Delta$ <i>fliF</i>                                                                                                                                                           |
| DS7160 | $\Delta$ 7 $\Delta$ <i>flgM</i>                                                                                                                                                           |
| DS7673 | $\Delta$ <i>flgE amyE::P<sub>fla/che</sub>-flgE<sup>T123C</sup> cat</i>                                                                                                                   |
| DS8521 | $\Delta$ <i>fliM amyE::P<sub>fla/che</sub>-fliM-GFP spec</i>                                                                                                                              |

512



513 **REFERENCES**

- 514
- 515 1. **Höltje J-V.** 1998. Growth of the stress-bearing and shape-maintaining murein sacculus of  
516 *Escherichia coli*. *Microbiol Mol Biol Rev* **62**:181-203.
- 517
- 518 2. **Typas A, Banzhaf M, Gross CA, Vollmer W.** 2012. From the regulation of peptidoglycan  
519 synthesis to bacterial growth and morphology. **10**:123-136.
- 520
- 521 3. **De Petris S.** 1967. Ultrastructure of the cell wall of *Escherichia coli* and chemical nature of  
522 its constituents. *J Ultrastructure Res* **19**:45-83.
- 523
- 524 4. **Gan L, Chen S, Jensen GJ.** 2008. Molecular organization of Gram-negative peptidoglycan.  
525 *Proc Natl Acad Sci USA* **105**:18953-18957.
- 526
- 527 5. **Turner RD, Mesnage S, Hobbs JK, Foster SJ.** 2018. Molecular imaging of glycan chains  
528 couples cell-wall polysaccharide architecture to bacterial cell morphology. *Nat Commun.*  
529 **9**:1263.
- 530
- 531 6. **Pasquina-Lemonche L, Burns J, Turner RD, Kumar S, Tank R, Mullin N, Wilson JS,**  
532 **Chakrabarti B, Bullough PA, Foster SJ, Hobbs JK.** 2020. The architecture of the Gram-  
533 positive bacterial cell wall. *Nature* **582**:294-297.
- 534
- 535 7. **Chevance FF, Hughes KT.** 2008. Coordinating assembly of a bacterial macromolecular  
536 machine. *Nat Rev Microbiol* **6**:455-465.
- 537
- 538 8. **Mukherjee S, Kearns DB.** 2014. The structure and regulation of flagella in *Bacillus subtilis*.  
539 *Annual Review of Genetics*, **48**, 319–340.
- 540
- 541 9. **Kubori T, Shimamoto N, Yamaguchi S, Namba K, Aizawa S-I.** 1992. Morphological  
542 pathway of flagellar assembly in *Salmonella typhimurium*. *J Mol Biol* **226**:433-446.
- 543
- 544 10. **Li H, Sourjik V.** 2011. Assembly and stability of flagellar motor in *Escherichia coli*. *Mol*  
545 *Microbiol* **80**:886-899.
- 546
- 547 11. **Chevance FFV, Takahashi N, Karlinsey JE, Gnerer J, Hirano T, Samudrala R, Aizawa**  
548 **S-I, Hughes KT.** 2007. The mechanism of outer membrane penetration by the eubacterial  
549 flagellum and implications for spirochete evolution. *Genes Dev* **21**:2326-2335.
- 550
- 551 12. **Courtney CR, Cozy LM, Kearns DB.** 2012. Molecular characterization of the flagellar  
552 hook in *Bacillus subtilis*. *J Bacteriol* **194**:4619-4629.
- 553
- 554 13. **Cohen EJ, Hughes KT.** 2014. Rod-to-hook transition for extracellular flagellum assembly  
555 is catalyzed by the L-ring-dependent rod scaffold removal. *J Bacteriol* **196**:2387-2395.
- 556
- 557 14. **Phillips AM, Calvo RA, Kearns DB.** 2015. Functional activation of the flagellar type III  
558 secretion export apparatus. *PLoS Genet* **11**:e1005443.
- 559
- 560 15. **Cohen EJ, Ferreira JL, Ladinsky MS, Beeby M, Hughes KT.** 2017. Nanoscale-length  
561 control of the flagellar driveshaft requires hitting the tethered outer membrane. *Science*  
562 **356**:197-200.
- 563

- 564 16. **Burrage AM, Vanderpool E, Kearns DB.** 2018. Assembly order of the flagellar rod  
565 subunits in *Bacillus subtilis*. J Bacteriol **200**:e00425-18.  
566
- 567 17. **Ferris HU, Furukawa Y, Minamino T, Kroetz MB, Kihara M, Namba K, Macnab RM.**  
568 2005. FlhB regulates ordered export of flagellar components via autocleavage mechanism. J  
569 Biol Chem **280**:41236-41242.  
570
- 571 18. **Erhardt M, Singer HM, Wee DH, Keener JP, Hughes KT.** 2011. An infrequent molecular  
572 ruler controls flagellar hook length in *Salmonella enterica*. EMBO J **30**:2948-2961.  
573
- 574 19. **Dijkstra AJ, Keck W.** 1996. Peptidoglycan as a barrier to transenvelope transport. J  
575 Bacteriol **178**:5555-5562.  
576
- 577 20. **Scheurwater EM, Burrows LL.** 2011. Maintaining network security: how macromolecular  
578 structures cross the peptidoglycan layer. FEMS Microbiol Lett **318**:1-9  
579
- 580 21. **Koraimann G.** 2003. Lytic transglycosylases in macromolecular transport systems of  
581 Gram-negative bacteria. Cell Mol Life Sci **60**:2371-2388.  
582
- 583 22. **DePamphilis ML, Adler J.** 1971. Fine structure and isolation of the hook-basal body  
584 complex of flagella from *Escherichia coli* and *Bacillus subtilis*. J Bacteriol **105**:384-395.  
585
- 586 23. **Sosinsky GE, Francis NR, Stallmeyer MJB, DeRosier DJ.** 1992. Substructure of the  
587 flagellar basal body of *Salmonella typhimurium*. J Mol Biol **223**:171-184.  
588
- 589 24. **Kubori T, Shimamoto N, Yamaguchi S, Namba K, Aizawa S-I.** 1992. Morphological  
590 pathway of flagellar assembly in *Salmonella typhimurium*. **226**:433-446.  
591
- 592 25. **Kubori T, Okumura M, Kobayashi N, Nakamura D, Iwakura M, Aizawa S-I.** 1997.  
593 Purification and characterization of the flagellar hook-basal body complex of *Bacillus subtilis*.  
594 Mol Microbiol **24**:399-410.  
595
- 596 26. **Zhao X, Zhang K, Boquoi T, Hu B, Motaleb MA, Miller KA, James ME, Charon NW,**  
597 **Manson MD, Norris SJ, Li C, Liu J.** 2013. Cryoelectron tomography reveals the sequential  
598 assembly of bacterial flagella in *Borrelia burgdorferi*. Proc Natl Acad Sci USA **110**:14390-  
599 14395.  
600
- 601 27. **Hamilton RC, Bover FG, Mason TJ.** 1975. An association between fimbriae and pores in  
602 the wall of *Fusiformis nodosus*. Journal of General Microbiology, **91**(2), 421–424.  
603
- 604 28. **Demchick P, Koch AL.** 1996. The permeability of the wall fabric of *Escherichia coli* and  
605 *Bacillus subtilis*. J Bacteriol **178**:773.  
606
- 607 29. **Fein JE, Rogers HJ.** 1976. Autolytic enzyme-deficient mutants of *Bacillus subtilis* 168. J  
608 Bacteriol **127**:1427–1442.  
609
- 610 30. **Fein JE.** 1979. Possible involvement of bacterial autolytic enzymes in flagellar  
611 morphogenesis. J Bacteriol **137**:933–946.  
612

- 613 31. **Nambu T, Minamino T, Macnab R, Kutsukake K.** 1999. Peptidoglycan-hydrolyzing  
614 activity of the FlgJ protein essential for flagellar rod formation in *Salmonella typhimurium*. *J*  
615 *Bacteriol* **181**:1555-1561.
- 616  
617 32. **Viollier PH, Shapiro L.** 2003. A lytic transglycosylase homolog, PleA, is required for the  
618 assembly of pili and the flagellum at the *Caulobacter crescentus* cell pole. *Mol Microbiol*  
619 **49**:331-345.
- 620  
621 33. **de la Mora J, Ballado T, González-Pedrajo B, Camarena L, Dreyfus G.** 2007 The  
622 flagellar muramidase from the photosynthetic bacterium *Rhodobacter sphaeroides*. *J Bacteriol*  
623 **189**:7998-8004.
- 624  
625 34. **de la Mora J, Osorio-Valeriano M, González-Pedrajo B, Ballado T, Camarena L,**  
626 **Dreyfus G.** 2012. The C terminus of the flagellar muramidase SltF modulates the interaction  
627 with FlgJ in *Rhodobacter sphaeroides*. *J Bacteriol* **194**:4513-4520.
- 628  
629 35. **García-Ramos M, del la Mora J, Ballado T, Camarena L, Dreyfus G.** 2018. Biochemical  
630 and phylogenetic study of SltF, a flagellar lytic transglycosylase from *Rhodobacter sphaeroides*.  
631 *J Bacteriol* **200**:e00397-18.
- 632  
633 36. **Smith TJ, Blackman SA, Foster SJ.** 2000. Autolysins of *Bacillus subtilis*: multiple  
634 enzymes with multiple functions. *Microbiol* **146**:249-262.
- 635  
636 37. **Vollmer W, Joris B, Charlier P, Foster S.** 2008. Bacterial peptidoglycan (murein)  
637 hydrolases. *FEMS Microbiol Rev* **32**:259-286.
- 638  
639 38. **Yamaguchi H, Furuhashi K, Fukushima T, Yamamoto H, Sekiguchi J.** 2004.  
640 Characterization of a new *Bacillus subtilis* peptidoglycan hydrolase gene, *yvcE* (named *cwIO*),  
641 and enzymatic properties of its encoded protein. *J Biosci Bioeng* **3**:174-181.
- 642  
643 39. **Hashimoto M, Ooiwa S, Sekiguchi J.** 2012. Synthetic lethality of the *lytE cwIO* genotype  
644 in *Bacillus subtilis* is caused by a lack of D,L-endopeptidase activity at the lateral cell wall. *J*  
645 *Bacteriol* **194**:796-803.
- 646  
647 40. **Sudiarta IP, Fukushima T, Sekiguchi J.** 2010. *Bacillus subtilis* CwlQ (previous YjbJ) is a  
648 bifunctional enzyme exhibiting muramidase and soluble-lytic transglycosylase activities.  
649 *Biochem Biophys Res Commun* **398**:606-612.
- 650  
651 41. **Chen R, Guttenplan SB, Blair KM, Kearns DB.** 2009. The role of Sigma D-dependent  
652 autolysins in *Bacillus subtilis* population heterogeneity. *J Bacteriol* **191**:5775-5784.
- 653  
654 42. **Meisner J, Llopis PM, Sham L-T, Garner E, Bernhardt TG, Rudner DZ.** 2013. FtsEX is  
655 required for CwlO peptidoglycan hydrolase activity during cell wall elongation in *Bacillus subtilis*.  
656 *Mol Microbiol* **89**:1069-1083.
- 657  
658 43. **Kearns DB, Losick R.** 2003. Swarming motility in undomesticated *Bacillus subtilis*. *Mol*  
659 *Microbiol* **49**:581-590.
- 660  
661 44. **Blair KM, Turner L, Winkelman JT, Berg HC, Kearns DB.** 2008. A molecular clutch  
662 disables flagella in the *Bacillus subtilis* biofilm. *Science* **320**:1636–1638.
- 663

- 664 45. **Guttenplan SB, Shaw S, Kearns DB.** 2013. The cell biology of peritrichous flagella in  
665 *Bacillus subtilis*. *Mol Microbiol* **87**:211–229.  
666
- 667 46. **Mukherjee S, Bree AC, Liu J, Patrick JE, Chien P, Kearns DB.** 2015. Adaptor-mediated  
668 Lon proteolysis restricts *Bacillus subtilis* hyperflagellation. *Proc Natl Acad Sci USA* **112**:250-  
669 255.  
670
- 671 47. **Nakano MM, Magnusson R, Myers A, Curry J, Grossman AD, Zuber P.** 1991. *srfA* is  
672 an operon required for surfactin production, competence development, and efficient sporulation  
673 in *Bacillus subtilis*. *J Bacteriol* **173**:1770-1778.  
674
- 675 48. **Cosima P, Rodriguez F, de Ferra F, Grandi G, Perego M, Venema G, van Sinderen D.**  
676 1993. Sequence and analysis of the genetic locus responsible for surfactin synthesis in *Bacillus*  
677 *subtilis*. *Mol Microbiol* **8**:821-831.  
678
- 679 49. **Branda SS, Gonzalez-Pastor JE, Ben-Yeduda S, Losick R, Kolter R.** 2001. Fruiting  
680 body formation by *Bacillus subtilis*. *Proc Natl Acad Sci USA* **98**:11621-11626.  
681
- 682 50. **Kearns DB, Chu F, Branda SS, Kolter R, Losick R.** 2005. A master regulator for biofilm  
683 formation in *Bacillus subtilis*. *Mol Microbiol* **55**:739-749.  
684
- 685 51. **Seminara A, Angelini TE, Wilking JN, Vlamakis H, Ebrahim S, Kolter R, Weitz DA,**  
686 **Brenner MP.** 2012. Osmotic spreading of *Bacillus subtilis* biofilms driven by an extracellular  
687 matrix. *Proc Natl Acad Sci USA* **109**:1116-1121.  
688
- 689 52. **Senesi S, Ghelardi E, Celandroni F, Salvetti S, Parisio E, Galizzi A.** 2004. Surface-  
690 associated flagellum formation and swarming differentiation in *Bacillus subtilis* are controlled by  
691 the ifm locus. *J Bacteriol* **186**:1158-1164.  
692
- 693 53. **Kearns DB, Losick R.** 2005. Cell population heterogeneity during growth of *Bacillus*  
694 *subtilis*. *Genes Dev* **19**:3083-3094.  
695
- 696 54. **Hall AN, Subramanian S, Oshiro RT, Canzoneri AK, Kearns DB.** 2017. SwrD (YzlI)  
697 promotes swarming in *Bacillus subtilis* by increasing power to flagellar motors. *J Bacteriol*  
698 **200**:e00529-17.  
699
- 700 55. **Hummels KR, Kearns DB.** 2019. Suppressor mutations in ribosomal proteins and FlhY  
701 restore *Bacillus subtilis* swarming motility in the absence of EF-P. *PLoS Genet* **15**:e1008179.  
702
- 703 56. **Holtje JV, Mirelman D, Sharon N, Schwarz U.** 1975. Novel type of murein  
704 transglycosylase in *Escherichia coli*. *J Bacteriol* **124**:1067–1076.  
705
- 706 57. **Scheurwater E, Reid CW, Clarke AJ.** 2008. Lytic transglycosylases: bacterial space-  
707 making autolysins. *Int J Biochem Cell Biol* **40**:586-591.  
708
- 709 58. **Calvo RA, Kearns DB.** 2015. FlgM is secreted by the flagellar export apparatus in *Bacillus*  
710 *subtilis*. *J Bacteriol* **197**:81–91.  
711
- 712 59. **Austen BM.** 1979. Predicted secondary structures of amino-terminal extension sequences  
713 of secreted proteins. *FEBS Lett* **103**:308-313.

- 714 60. **von Heijne G, Blomberg C.** 1979. Trans-membrane translocation of proteins. *Eur J*  
715 *Biochem* **97**:175-181.  
716
- 717 61. **Sargent F, Bogsch EG, Stanley NR, Wexler M, Robinson C, Berks BC, Palmer T.** 1998.  
718 Overlapping functions of components of a bacterial Sec-independent protein export pathway.  
719 *The EMBO Journal*, **17**(13), 3640–3650.  
720
- 721 62. **Emanuelsson O, Brunak S, von Heijne G, Nielsen H.** 2007. Locating proteins in the cell  
722 using TargetP, SignalP and related tools. *Nature Protocols*, **2**(4), 953–971.  
723
- 724 63. **Arnold R, Brandmaier S, Kleine F, Tischler P, Heinz E, Behrens S, Niinkoski A, Mewes**  
725 **H-W, Horn M, Rattei T.** 2009. Sequence-based prediction of type III secreted proteins. *PLoS*  
726 *Pathogens* **5**:e1000376.  
727
- 728 64. **Samudrala R, Heffron F, McDermott JE.** 2009. Accurate prediction of secreted  
729 substrates and identification of a conserved putative secretion signal for type III secretion  
730 systems. *PLoS Pathogens* **5**:e1000375.  
731
- 732 65. **Deng W, Marshall NC, Rowland JL, McCoy JM, Worrall LJ, Santos AS, Strynadka**  
733 **NCJ, Finlay BB.** 2017. Assembly, structure, function and regulation of type III secretion  
734 systems. *Nat Rev Microbiol* **15**:323-337.  
735
- 736 66. **Hughes KT, Gillen KL, Semon MJ, Karlinsey JE.** 1993. Sensing structural intermediates  
737 in bacterial flagellar assembly by export of a negative regulator. *Science*, **262**:1277–1280.  
738
- 739 67. **Kutsukake K, Iyoda S, Ohnishi K, Iino T.** 1994. Genetic and molecular analyses of the  
740 interaction between the flagellum-specific sigma and anti-sigma factors in *Salmonella*  
741 *typhimurium*. *EMBO J.* **13**:4568–4576.  
742
- 743 68. **Caramori T, Barilla D, Nessi C, Sacchi L, Galizzi A.** 1996. Role of FlgM in sigma D-  
744 dependent gene expression in *Bacillus subtilis*. *J Bacteriol* **178**:3113–3118.  
745
- 746 69. **Bertero MG, Gonzales B, Tarricone C, Cecilian F, Galizzi A.** 1999. Overproduction and  
747 characterization of the *Bacillus subtilis* anti-sigma factor FlgM. *J Biol Chem.* **274**:12103–07.  
748
- 749 70. **Konkol MA, Blair KM, Kearns DB.** 2013. Plasmid-encoded ComI inhibits competence in  
750 the ancestral 3610 strain of *Bacillus subtilis*. *J Bacteriol* **195**:4085-4093.  
751
- 752 71. **Yasbin RE, Young FE.** 1974. Transduction in *Bacillus subtilis* by bacteriophage SPP1. *J*  
753 *Virology* **14**:1343-1348.  
754
- 755 72. **Guérout-Fleury AM, Shazand, K, Frandsen N, Stragier P.** 1995. Antibiotic-resistance  
756 cassettes for *Bacillus subtilis*. *Gene* **167**:335-336.  
757
- 758 73. **Kain J, He GG, Losick R.** 2008. Polar localization and compartmentalization of ClpP  
759 proteases during growth and sporulation in *Bacillus subtilis*. *J Bacteriol* **190**:6749-6757.  
760
- 761 74. **Gibson DG, Young L, Chuang R-Y, Venter JC, Hutchinson III CA, Smith HO.** 2009.  
762 Enzymatic assembly of DNA molecules up to several hundred kilobases. *Nature Methods*  
763 **6**:343-345.  
764

- 765 75. **Patrick JE, Kearns DB.** 2008. MinJ (YvjD) is a topological determinant of cell division in  
766 *Bacillus subtilis*. *Mol Microbiol* **70**:1166-1179.  
767
- 768 76. **Koo BM, Kritikos G, Farelli JD, Todor H, Tong K, Kimsey H, Wapinski I, Galardini M,**  
769 **Cabal A, Peters JM, Hachmann AB, Rudner DZ, Allen KN, Typas A, Gross CA.** 2017.  
770 Construction and analysis of two genome-scale deletion libraries for *Bacillus subtilis*. *Cell Syst*  
771 **22**:291-305.  
772
- 773 77. **Antoniewski C, Savelli B, Stragier P.** 1990. The *spolIJ* gene, which regulates early  
774 developmental steps in *Bacillus subtilis*, belongs to a class of environmentally responsive  
775 genes. *J Bacteriol* **172**:86-93.  
776
- 777 78. **Regamey A, Karamata D.** 1998. The N-acetylmuramoyl-L-alanine amidase encoded by  
778 the *Bacillus subtilis* 168 prophage SP $\beta$ . *Microbiol* **144**:885-893.  
779
- 780 79. **Kuroda A, Imazeki M, Sekiguchi J.** 1991. Purification and characterization of a cell wall  
781 hydrolase encoded by the *cwIA* gene of *Bacillus subtilis*. *FEMS Microbiol Lett* **81**:9-14.  
782
- 783 80. **Kuroda A, Asami Y, Sekiguchi J.** 1993. Molecular cloning of a sporulation-specific cell  
784 wall hydrolase gene of *Bacillus subtilis*. *J Bacteriol* **175**:6260-6268.  
785
- 786 81. **Shida T, Hattori H, Ise F, Sekiguchi J.** 2000. Overexpression, purification, and  
787 characterization of *Bacillus subtilis* N-acetylmuramoyl-L-alanine amidase CwIC. *Biosci*  
788 *Biotechnol Biochem* **64**:1522-1525.  
789
- 790 82. **Sekiguchi J, Akeo K, Yamamoto H, Khasanov FK, Alonso JC, Kuroda A.** 1995.  
791 Nucleotide sequence and regulation of a putative cell wall hydrolase gene, *cwID*, which affects  
792 germination in *Bacillus subtilis*. *J Bacteriol* **177**:5582-5589.  
793
- 794 83. **Nugroho FA, Yamamoto H, Kobayashi Y, Sekiguchi J.** 1999. Characterization of a new  
795 Sigma-K-dependent peptidoglycan hydrolase gene that plays a role in *Bacillus subtilis* mother  
796 cell lysis. *J Bacteriol* **181**:6230-6237.  
797
- 798 84. **Sudiarta IP, Fukushima T, Sekiguchi J.** 2010. *Bacillus subtilis* CwIP of the SP- $\beta$   
799 prophage has two novel peptidoglycan hydrolase domains, muramidase and cross-linkage  
800 digesting DD-endopeptidase. *J Biol Chem* **285**:41232-41243.  
801
- 802 85. **Fukushima T, Kitajima T, Yamaguchi H, Ouyang Q, Furuhashi K, Yamamoto H, Shida**  
803 **T, Sekiguchi J.** 2008. Identification and characterization of novel cell wall hydrolase CwIT. *J*  
804 *Biol Chem* **283**:11117-11125.  
805
- 806 86. **DeWitt T, Grossman AD.** 2014. The bifunctional cell wall hydrolase CwIT is needed for  
807 conjugation of the integrative and conjugative element ICEBs1 in *Bacillus subtilis* and *B.*  
808 *anthracis*. *J Bacteriol* **196**:1588-1596.  
809
- 810 87. **Horsburgh GJ, Atrih A, Foster SJ.** 2003. Characterization of LytH, a differentiation-  
811 associated peptidoglycan hydrolase of *Bacillus subtilis* involved in endospore cortex maturation.  
812 *J Bacteriol* **185**:3813-3820.  
813
- 814 88. **Abanes-De Mello A, Sun Y-L, Aung S, Pogliano K.** 2002. A cytoskeleton-like role for the  
815 bacterial cell wall during engulfment of the *Bacillus subtilis* forespore. *Genes Dev* **16**:3253-

- 816 3264.  
817  
818 89. **Morlot C, Uehara T, Marquis KA, Bernhardt TG, Rudner DZ.** 2010. A highly  
819 coordinated cell wall degradation machine governs spore morphogenesis in *Bacillus subtilis*.  
820 *Genes Dev* **24**:411-422.  
821  
822 90. **Chastanet A, Losick R.** 2007. Engulfment during sporulation in *Bacillus subtilis* governed  
823 by a multi-protein complex containing tandemly acting autolysins. *Environ Microbiol* **64**:139-  
824 152.  
825  
826 91. **Longchamp PF, Mauël C, Karamata D.** 1994. Lytic enzymes associated with defective  
827 prophages of *Bacillus subtilis*: sequencing and characterization of the region comprising the N-  
828 acetylmuramoyl-L-alanine amidase gene of prophage PBSX. *Microbiol* **140**:1855-1867.  
829  
830 92. **Fukushima T, Yao Y, Kitajima T, Yamamoto H, Sekiguchi J.** 2007. Characterization of  
831 new L,D-endopeptidase gene product CwlK (previously YcdD) that hydrolyzes peptidoglycan in  
832 *Bacillus subtilis*. *Mol Genet Genomics* **278**:371-383.  
833  
834 93. **Margot P, Mauël C, Karamata D.** 1994. The gene of the N-acetylglucosaminidase, a  
835 *Bacillus subtilis* 168 cell wall hydrolase not involved in vegetative cell autolysis. *Mol Microbiol*  
836 **12**:535-545.  
837  
838 94. **Rashid MH, Mori M, Sekiguchi J.** 1995. Glucosaminidase of *Bacillus subtilis*: cloning,  
839 regulation, primary structure and biochemical characterization. *Microbiol* **141**:2391-2404.  
840  
841 95. **Fukushima T, Afkham A, Kurosawa S-I, Tanabe T, Yamamoto H, Sekiguchi J.** 2006. A  
842 new D,L-endopeptidase gene product, YojL (renamed CwlS), plays a role in cell separation with  
843 LytE and LytF in *Bacillus subtilis*. *J Bacteriol* **188**:5541-5550.  
844  
845 96. **Margot P, Wahlen M, Gholamhuseinian A, Piggot P, Karamata D.** 1998. The *lytE* gene  
846 of *Bacillus subtilis* 168 encodes a cell wall hydrolase. *J Bacteriol* **180**:749-752.  
847  
848 97. **Ishikawa S, Hara Y, Ohnishi R, Sekiguchi J.** 1998. Regulation of a new cell wall  
849 hydrolase gene, *cwlF*, which affects cell separation in *Bacillus subtilis*. *J Bacteriol* **180**:2549-  
850 2555.  
851  
852 98. **Margot P, Pagni M, Karamata D.** 1999. *Bacillus subtilis* 168 gene *lytF* encodes a  
853 gamma-D-glutamate-meso-diaminopimelate muropeptidase expressed by the alternative sigma  
854 factor, sigma D. *Microbiol* **145**:57-65.  
855  
856 99. **Ohnishi R, Ishikawa S, Sekiguchi J.** 1999. Peptidoglycan hydrolase LytF plays a role in  
857 cell separation with CwlF during vegetative growth of *Bacillus subtilis*. *J Bacteriol* **181**:3178-  
858 3184.  
859  
860 100. **Horsburgh GJ, Atrih A, Williamson MP, Foster SJ.** 2003. LytG of *Bacillus subtilis* is a  
861 novel peptidoglycan hydrolase: the major active glucosaminidase. *Biochem* **42**:257-264.  
862  
863 101. **Hashimoto M, Matsushima H, Suparthana IP, Ogasawara H, Yamamoto H, Teng CH,**  
864 **Sekiguchi J.** 2018. Digestion of peptidoglycan near the cross-link is necessary for the growth  
865 of *Bacillus subtilis*. *Microbiol* **164**:299-307.  
866

- 867 102. **Shah IM, Dworkin J.** 2010. Induction and regulation of a secreted peptidoglycan  
868 hydrolase by a membrane Ser/Thr kinase that detects muropeptides. *Mol Microbiol* **75**:1232-  
869 1243.  
870
- 871 103. **Hashimoto M, Fujikura K, Miyake Y, Higashitsuji Y, Kiriya Y, Tanaka T, Yamamoto**  
872 **H, Sekiguchi J.** 2014. A cell wall proteins (YqgA) is genetically related to the cell wall-  
873 degrading DL-endopeptidases in *Bacillus subtilis*. *Biosci Biotech Biochem* **78**:1428-1434.  
874  
875



876 **FIGURE LEGENDS**

877 **Figure 1. CwlQ is required for swarming motility.** A) Quantitative swarm expansion assay  
878 of wild type (open circles, DK1042), *cwlQ* (black circles, DK1744), *cwlQ* (*cwlQ*) (gray circles,  
879 DK3586), and *cwlQ* (*cwlQ*<sup>E148A</sup>) (open diamonds, DK4127). B) Quantitative swarm expansion  
880 assay of wild type (open circles, DK1042), *cwlO* (black circles, DK8462), and *cwlO* (Pspank-  
881 *cwlO*) in the presence of 1 mM IPTG (gray circles, DK8842). C) Quantitative swarm expansion  
882 assay indicating the swarm radius after 4 hours of incubation on media fortified with the  
883 indicated amount of agar for the following strains: wild type (open circles, DK1042), *cwlQ* (black  
884 circles, DK1744), *cwlQ* (*cwlQ*) (gray circles, DK3586), and *cwlQ* (*cwlQ*<sup>E148A</sup>) (open diamonds,  
885 DK4127). D) Quantitative swarm expansion assay indicating the swarm radius after 4 hours of  
886 incubation on media fortified with the indicated amount of agar for the following strains: wild type  
887 (open circles, DK1042), *swrA* (gray circles, DS2415), and *swrD* (black circles, DS6657). E)  
888 Quantitative swarm expansion assay of wild type (open circles, DK1042), *cwlQ* (black circles,  
889 DK1744), and *cwlQ smiA* (gray circles, DK8018). F) Quantitative swarm expansion assay of  
890 *cwlQ* mutant ectopically complemented with the indicated versions of *cwlQ*: wild type (open  
891 circles, DK3586), D36-63 (open diamonds, DK8472), D2-63 (black circles, DK8470) and D2-35  
892 (gray circles, DK8471). All data points are the average of three replicates.

893

894 **Figure 2: Cells mutated for CwlQ have a slight but statistically significant reduction in**  
895 **the number of flagellar hooks and basal bodies.** A) Fluorescence micrographs of cells of the  
896 indicated genotype stained for membranes (false colored red) and flagellar filaments (false  
897 colored green). The following strains were used to generate this panel: WT (DS1919) and  
898 *cwlQ* (DK1770). B) Fluorescence micrographs of cells of the indicated genotype stained for  
899 membranes (false colored red) and flagellar hooks (false colored green). The following strains  
900 were used to generate this panel: WT (DS7673) and *cwlQ* (DK1771). B) Fluorescence

901 micrographs of cells of the indicated genotype stained for membranes (false colored red) and  
902 flagellar basal bodies (FliM-GFP, false colored green). The following strains were used to  
903 generate this panel: WT (DS8521) and *cwIQ* (DK1047). D) Scatter plots in which individual wild  
904 type (red) and *cwIQ* mutant (blue) cells were measured by OMX 3D-SIM for cell length and the  
905 number of flagellar hooks (left) and flagellar basal bodies (right) were counted with Imaris  
906 software. Thirty cells were measured per experiment and each cell is represented by a different  
907 dot on the graph. Averages and standard deviations are colored according to the data set to  
908 which they belong. Raw data is included as supplemental table (**Table S3**).

909

910 **Figure 3: Cells mutated for CwIQ are proficient for swimming motility.** LB agar Petri  
911 plates fortified with 0.3% agar were centrally inoculated, incubated at 37°C for 12 hours, and  
912 filmed against a black background such that zones of colonization appear white and uncolonized  
913 agar appears black. Each strain contained the indicated alleles plus mutants in *srfAA* and *epsH*  
914 to discourage movement across the surface and force cells to swim through the agar. The  
915 following strains were used to generate the figure: WT (DK374), *hag* (DK378), *cwIQ* (DK2491),  
916 and *cwIQ* (*cwIQ*<sup>E148A</sup>) (DK7051).

917

918 **Figure 4. CwIQ is secreted by the flagellar type III secretion system and destroyed by**  
919 **extracellular proteases.** A) Cartoon diagram of the 244 amino acid CwIQ protein primary  
920 sequence from N-terminus (left) to C-terminus (right). Important amino acid residue numbers  
921 are indicated above the diagram and the domains of unknown function (DUF) and lytic  
922 transglycosylase domains are indicated below. B-E) Western blot analysis of cell pellets and  
923 TCA precipitated supernatants resolved by SDS-PAGE and probed either with anti-CwIQ or  
924 anti-SigA antibodies. Panel B) WT (DK1042), *cwIQ* (DK1744), *cwIQ* (*cwIQ*) (DK3586), and *cwIQ*  
925 (*cwIQ*<sup>E148A</sup>) (DK4127). Panel C)  $\Delta 7$  (DS6329),  $\Delta 7$  *cwIQ* (*cwIQ*) (DK8697), and  $\Delta 7$  *cwIQ*

926 (*cwIQ*<sup>E148A</sup>) (DK8698). Panel D)  $\Delta 7$  *fliF* (DS6871),  $\Delta 7$  *flgM* (DS7160),  $\Delta 7$  *fliF flgM* (DK5150).

927 Panel E) *cwIQ* (*cwIQ* <sup>$\Delta 2-63$</sup> ) (DK8699), *cwIQ* (*cwIQ* <sup>$\Delta 2-35$</sup> ) (DK8700), and *cwIQ* (*cwIQ* <sup>$\Delta 36-63$</sup> )

928 (DK8701).

929

930 **Figure 5. The *cwIQ* gene is expressed by RNA polymerase and the alternative sigma**

931 **factor, SigD.**  $\beta$ -galactosidase activities of a transcriptional fusion of the promoter of *cwIQ* to the

932 *lacZ* gene encoding  $\beta$ -galactosidase (*P<sub>cwIQ</sub>-lacZ*) in the indicated genetic backgrounds and

933 expressed in Miller units (MU). Each bar is the average of three replicates and standard

934 deviations are provided. The following strains were used to generate the figure: WT (DK2185),

935 *fliF* (DK8864), *sigD* (DK2207), *flgM* (DK2347), and *fliF flgM* (DK8665).

936

937 **Figure 6: A strain simultaneously mutated for CwIQ, CwIO, and three other PG**

938 **hydrolases is proficient for flagellar biosynthesis.** Fluorescence micrographs of cells of the

939 indicated genotype stained for membranes (false colored red) and flagellar filaments (false

940 colored green). The following strains were used to generate this panel: *cwIQ lytC lytD lytF*

941 (DK7570), *cwIQ cwIO lytC lytD lytF* (DK8815) *cwIO* (DK8816), *cwIQ cwIO* (DK8783), and *cwIO*

942 *lytC* (DK8787).

943

944 **Figure S1. Most mutants in PG hydrolase candidates were wild type for swarming**

945 **motility.** Quantitative swarm expansion assay of wild type (open circles) and the indicated

946 mutant (closed circles). Each data point is the average of three replicates. The same wild type

947 data may be repeated for multiple panels as one wild type control set was performed in swarm

948 expansion assays with the corresponding mutants on the same day. The following strains were

949 used to generate the panels: wild type (DK1042), *cwIK* (DK5178), *lytE* (DK1024), *lytG*

950 (DK1128), *cwIS* (DK1023), *yocH* (DK4677), *yqgA* (DK6611), *yqgT* (DK4678), *yqil* (DK6423), and

951 *yrvJ* (DK3579).

Figure 1

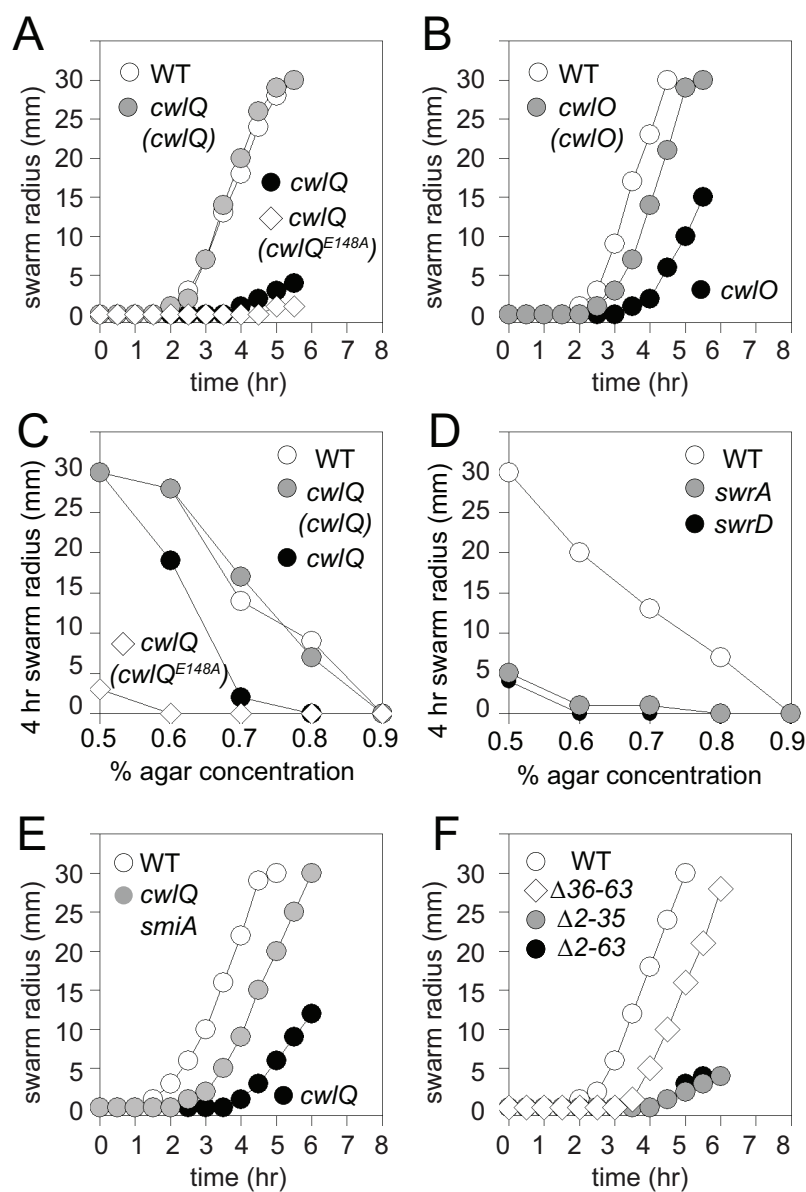

Figure 2

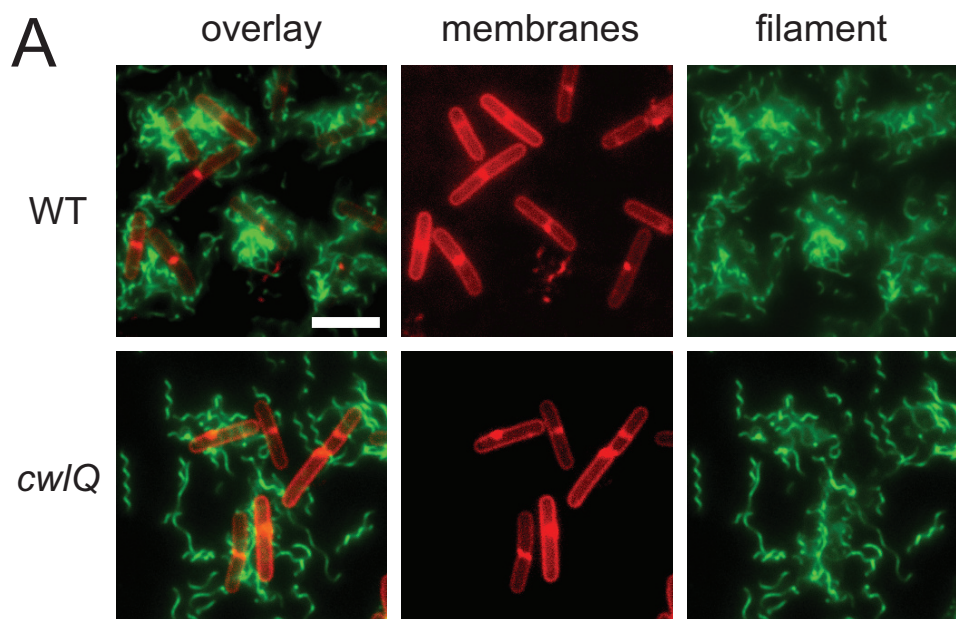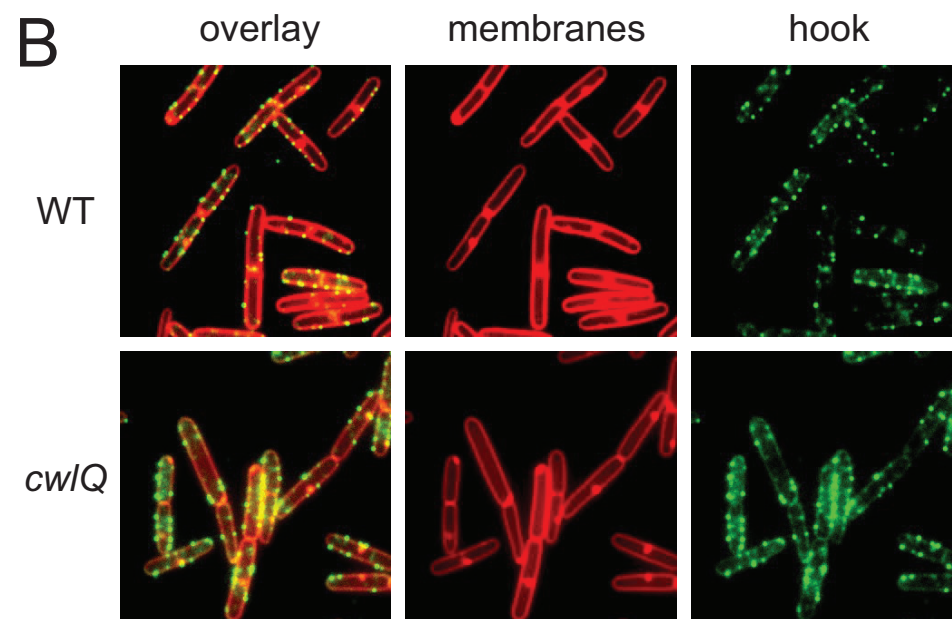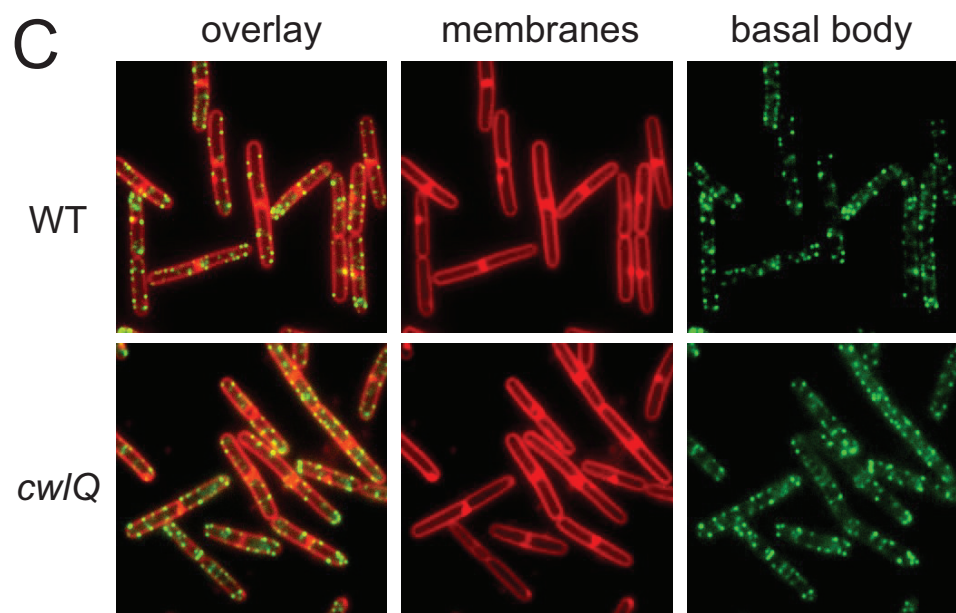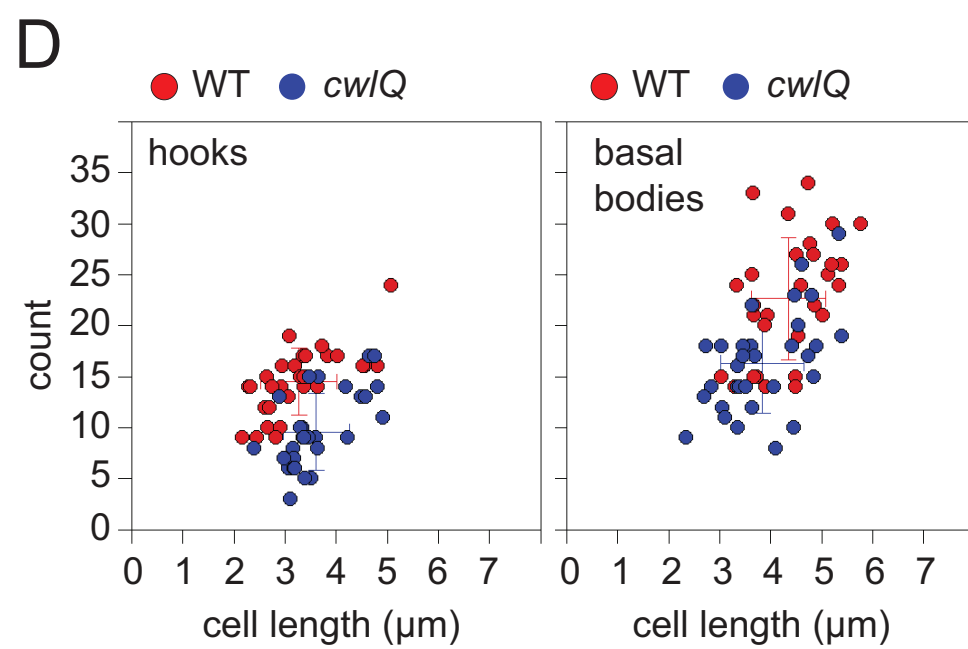

# Figure 3

WT

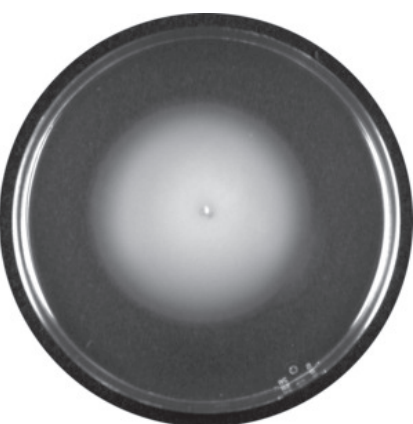

*hag*

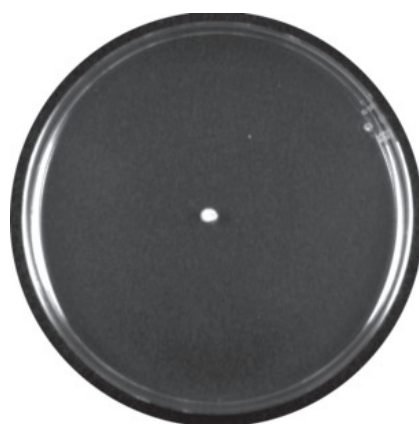

*cwlQ*

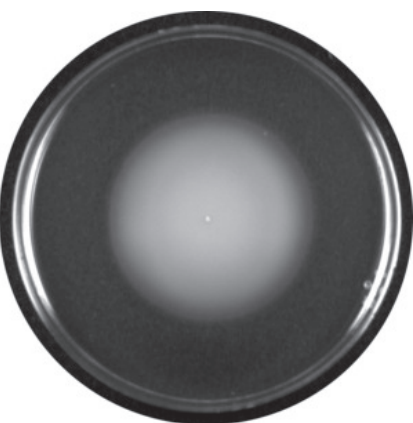

*cwlQ* (*cwlQ*<sup>E148A</sup>)

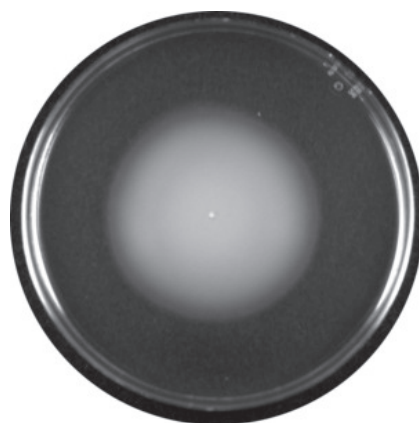

# Figure 4

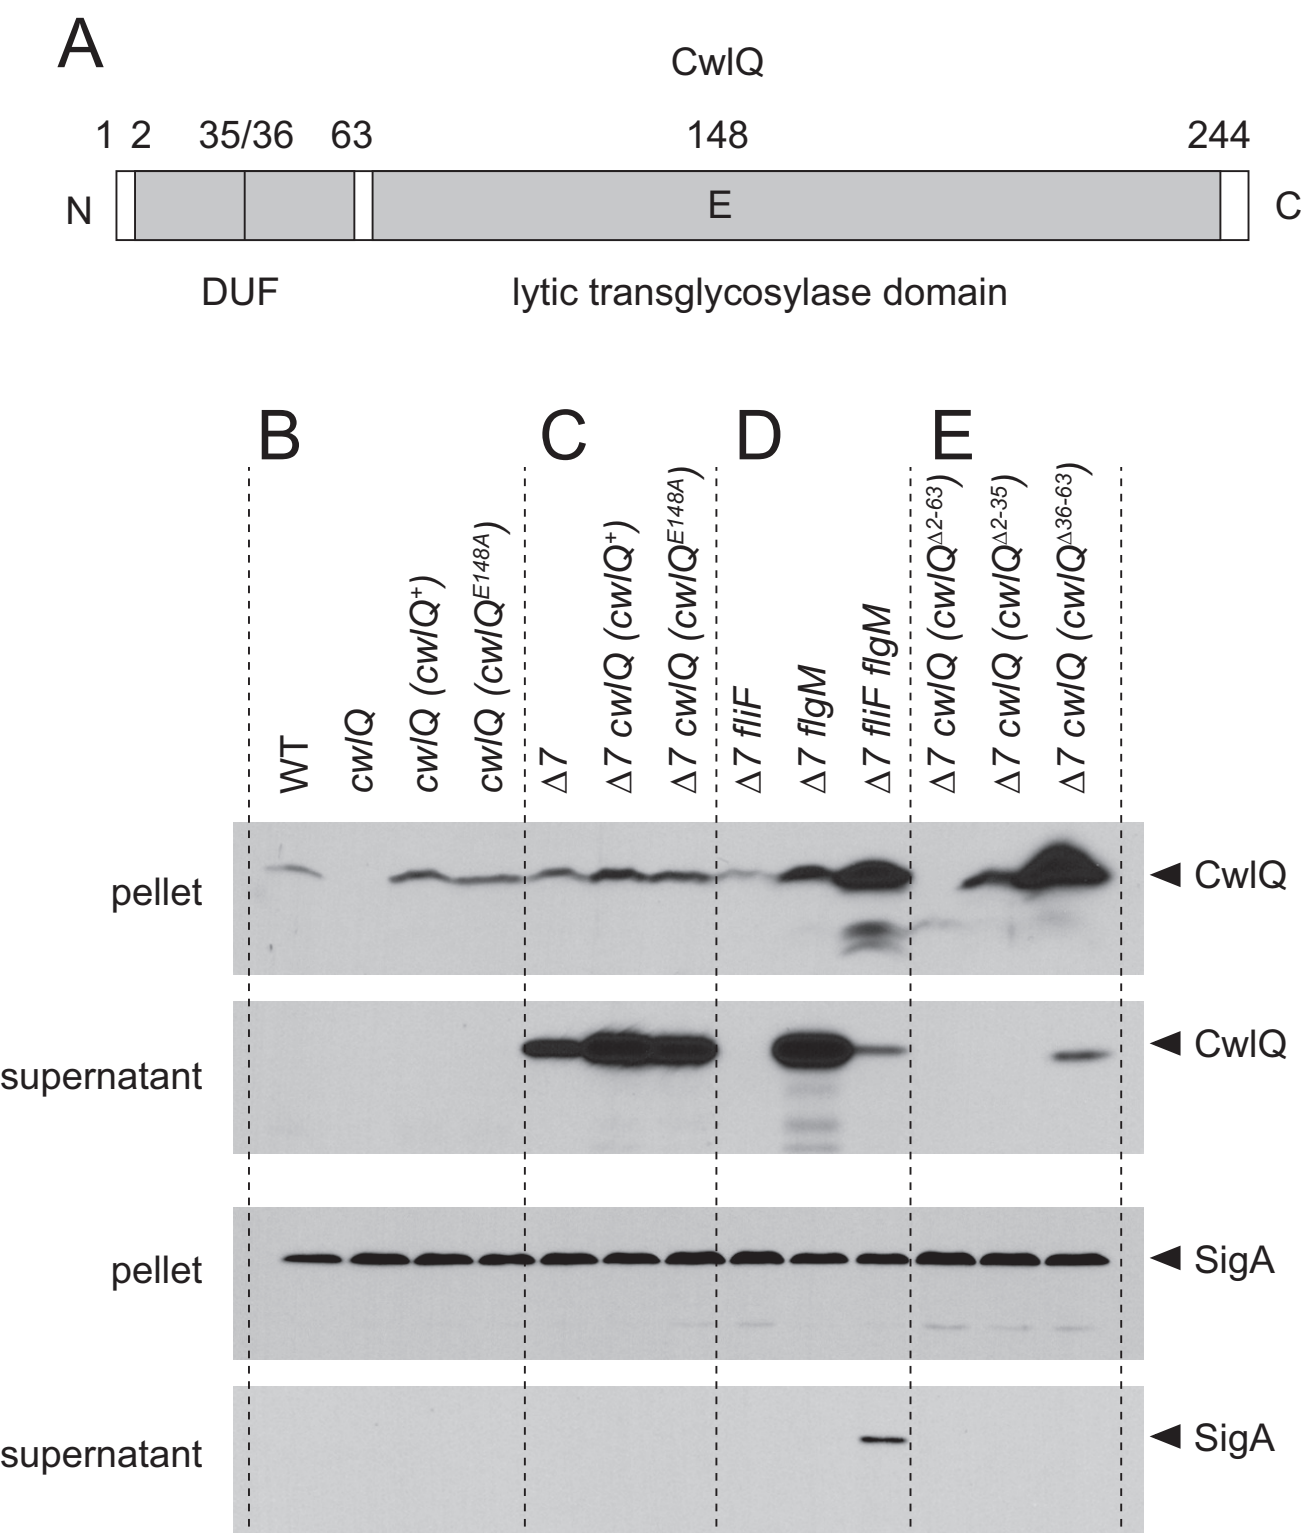

Figure 5

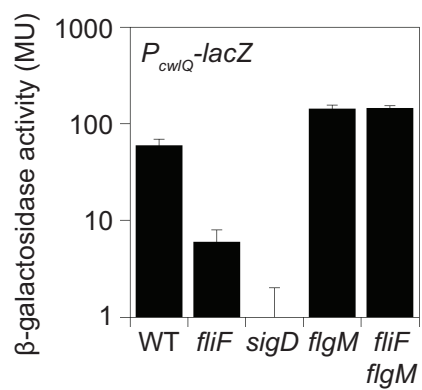



Figure 6

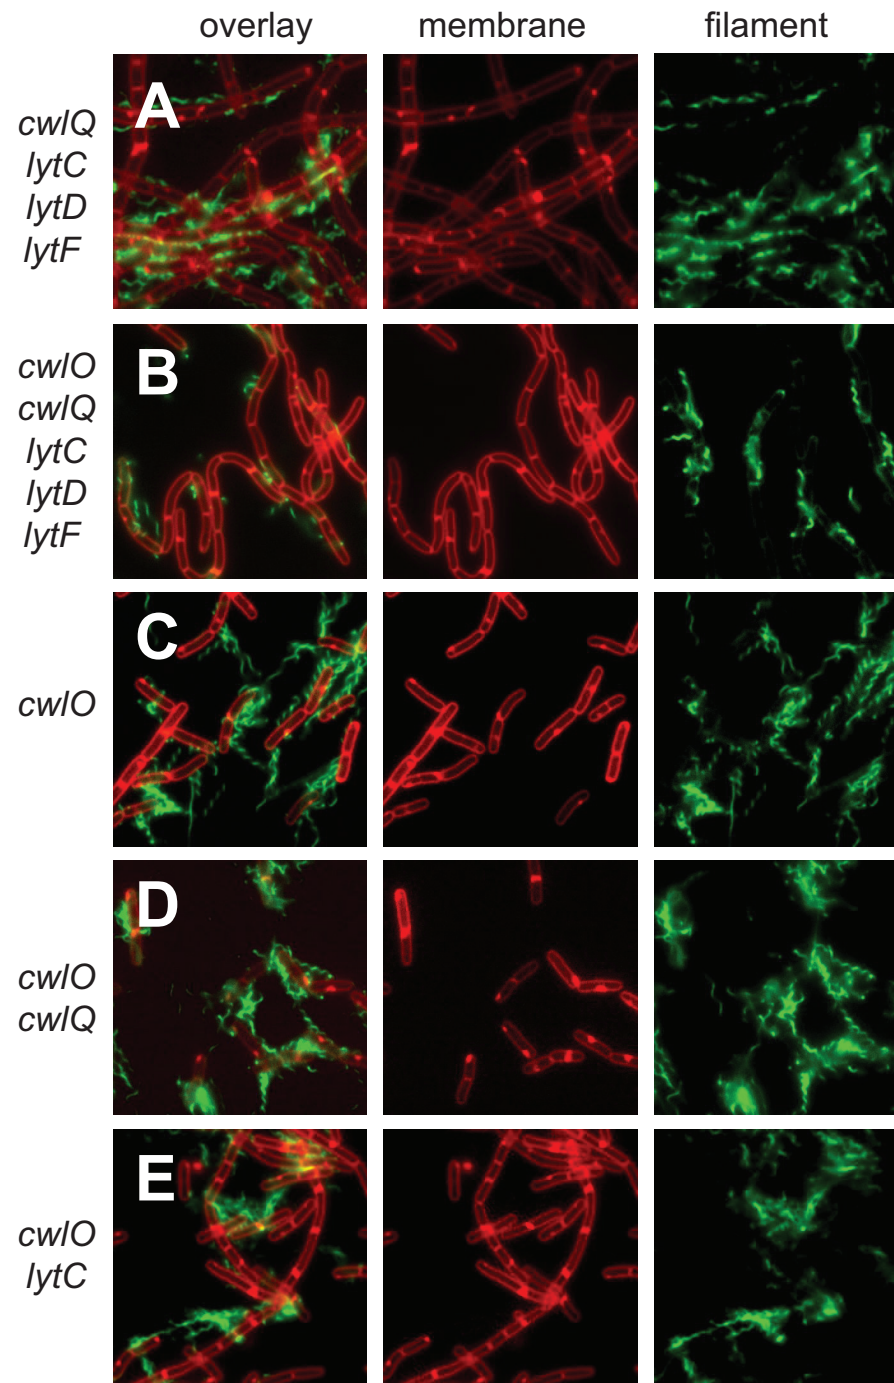

Source: http://biorxiv.org/content/10.1101/2021.01.13.426625v1.full.pdf
